# Supplementary material for: Genotype Selection, and Seed Uniformity and Multiplication to Ensure Common Bean (Phaseolus vulgaris L.) var. Liborino
Source: MDPI journal article supplement (doi:10.3390/agronomy12102285), 2022-09-23
Supplement: s1 [file s1]

**Figure S1.** Seed coat color patterns across the 44 tested accessions of Liborino common bean (*Phaseolus vulgaris* L.), G identifiers follow CIAT's genebank.

Sample 1 ID: G12702 (1)

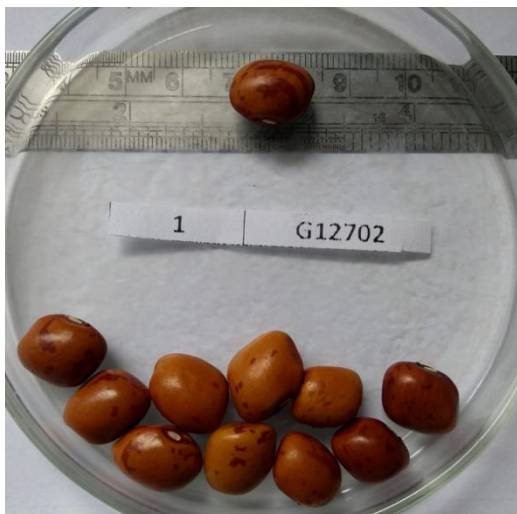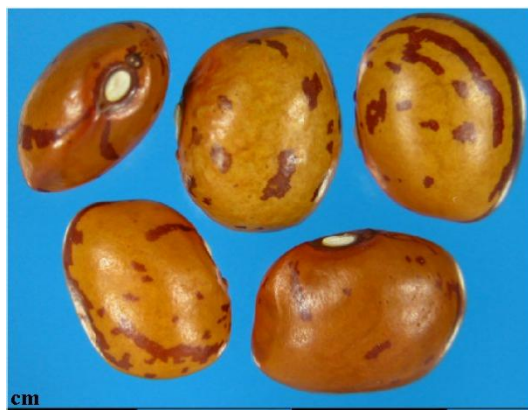

Sample 2 ID: G11819 (1)

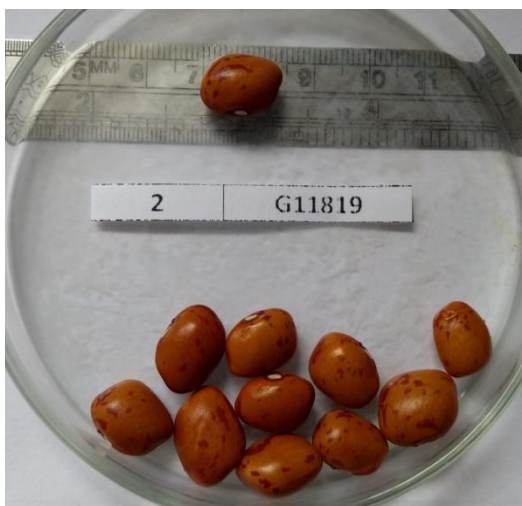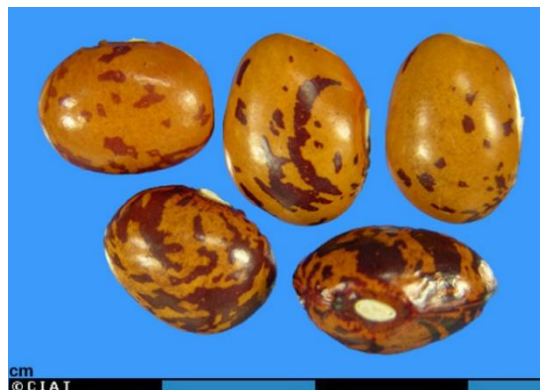

Sample 3 ID: G50834 (1)

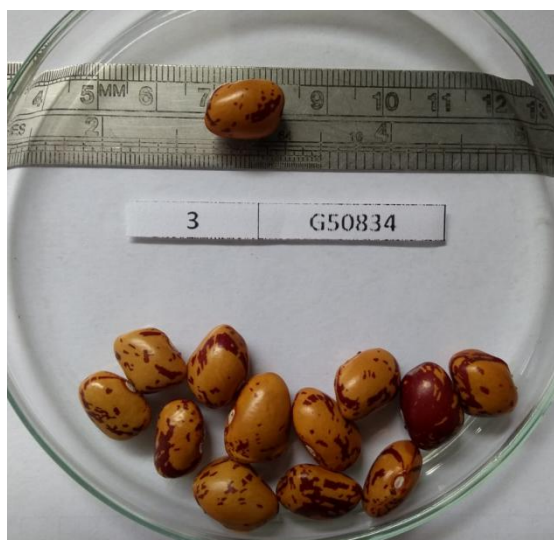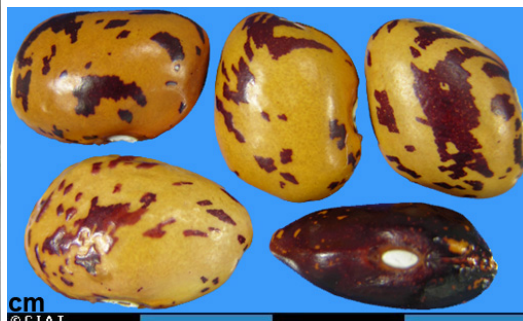

Sample 4 ID: G50840 (2)

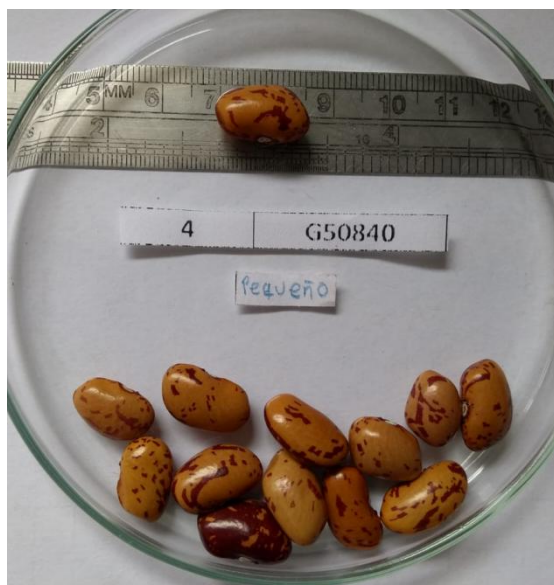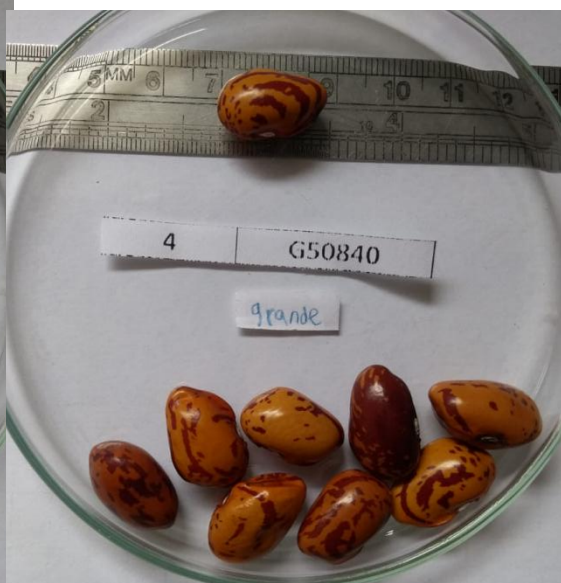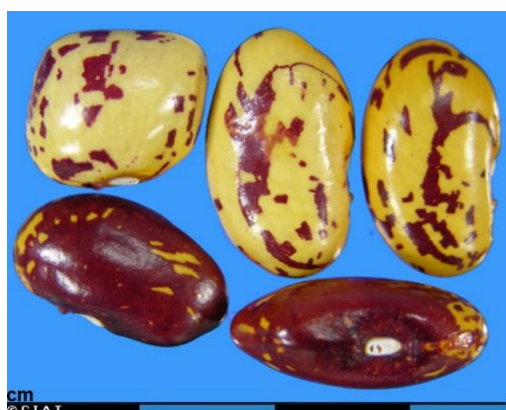



Sample 5 ID: G50516F (5)

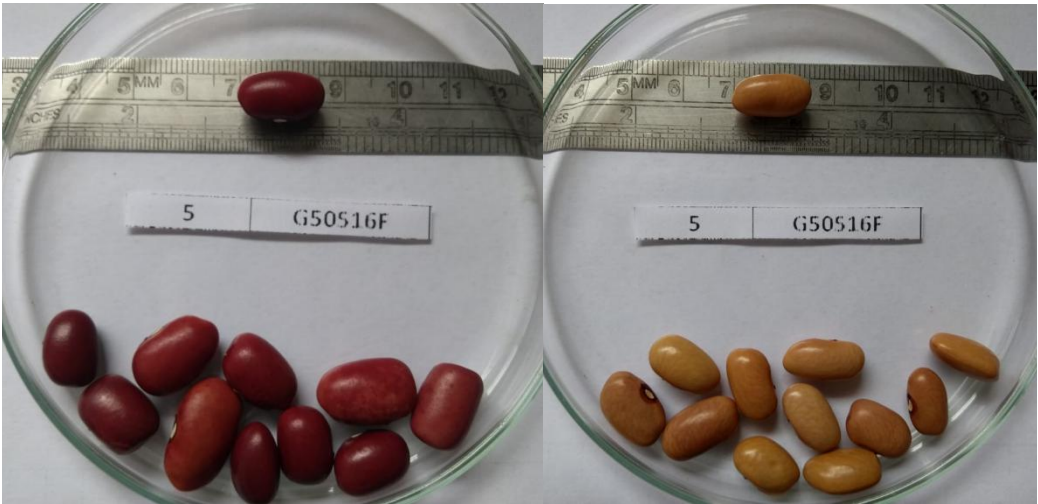

Chosen

Chosen

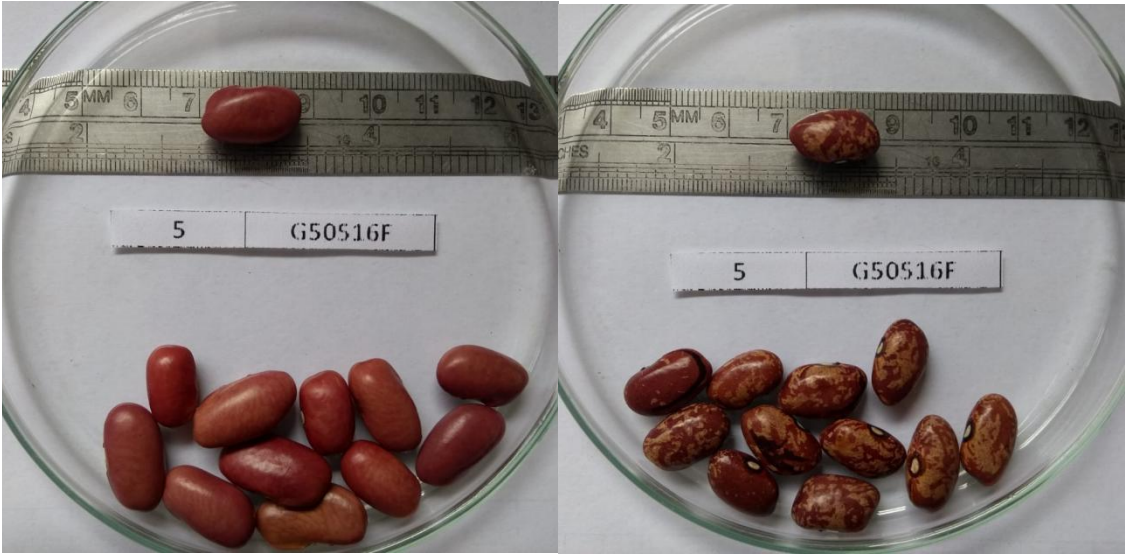

Chosen

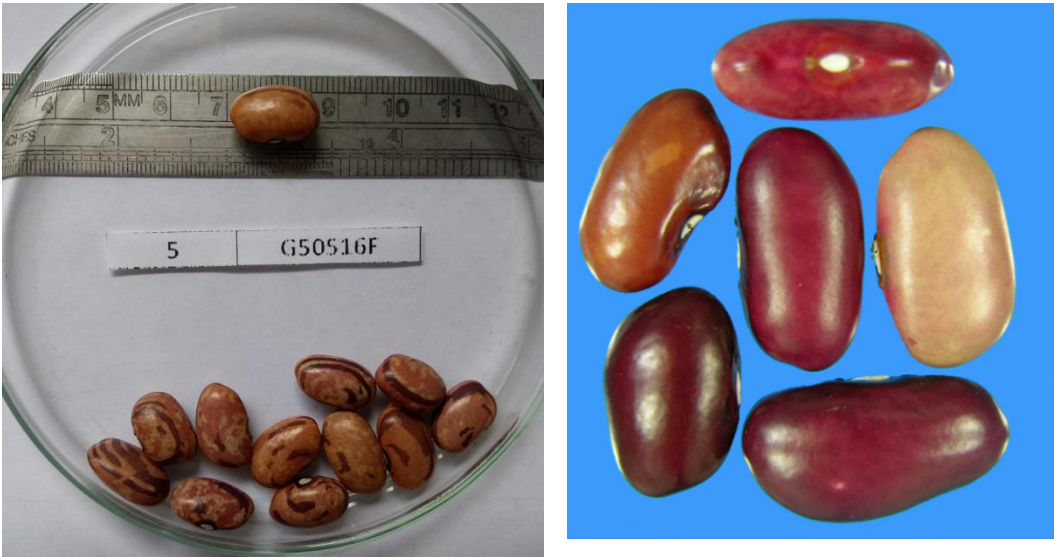

Sample 6 ID: G50516G (12)

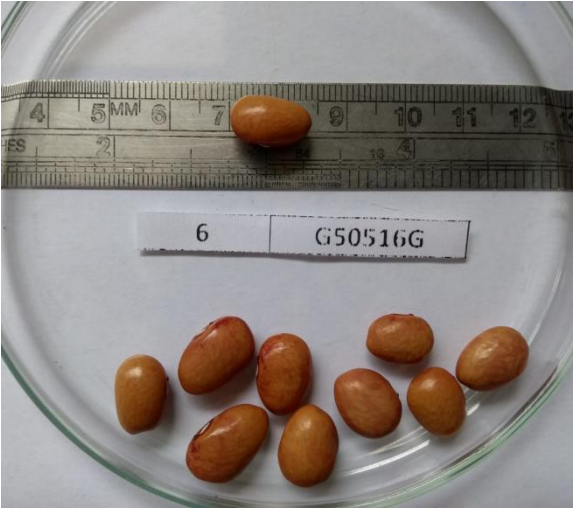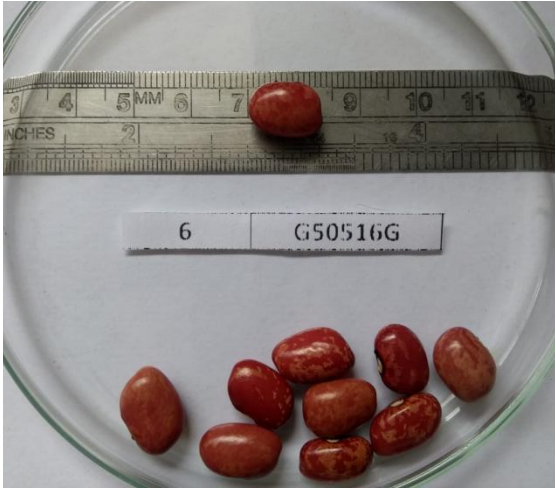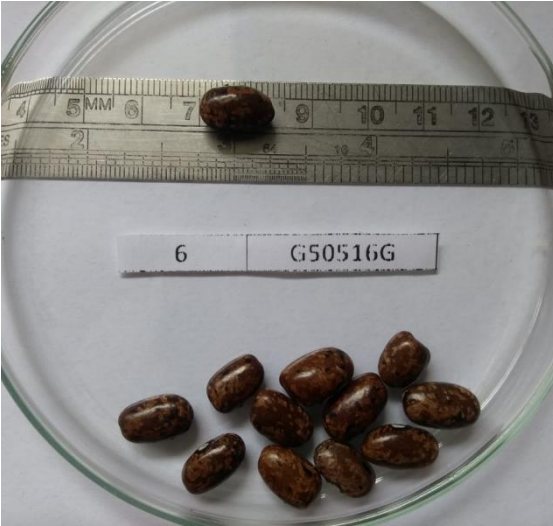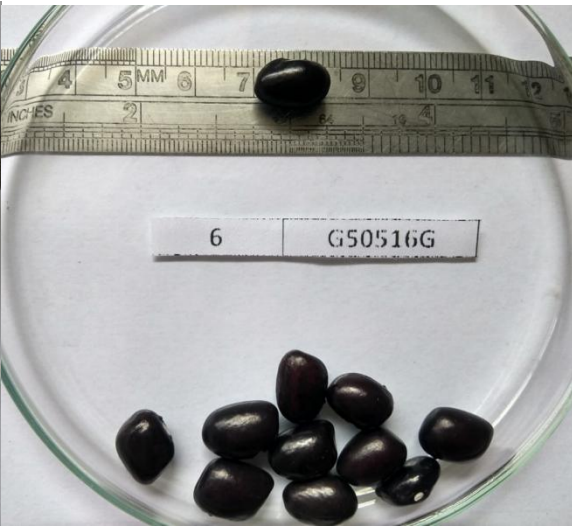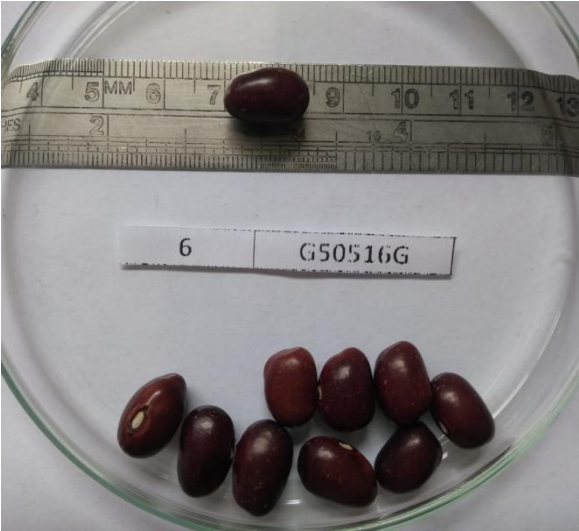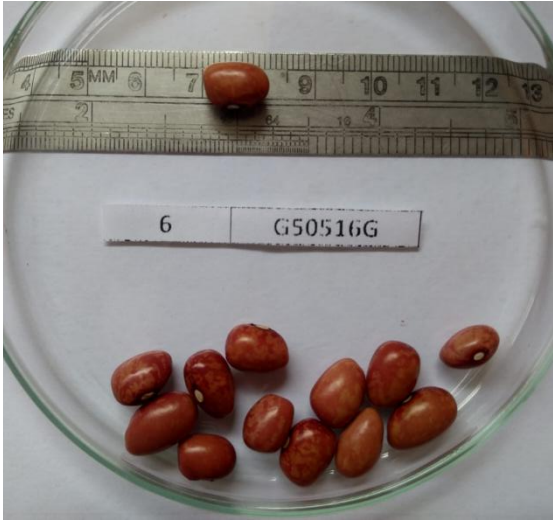

Chosen



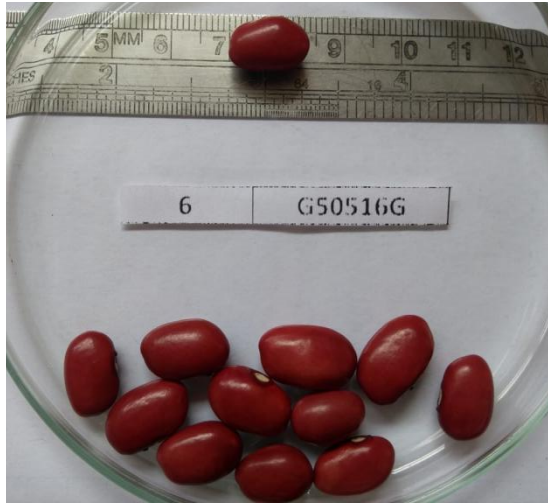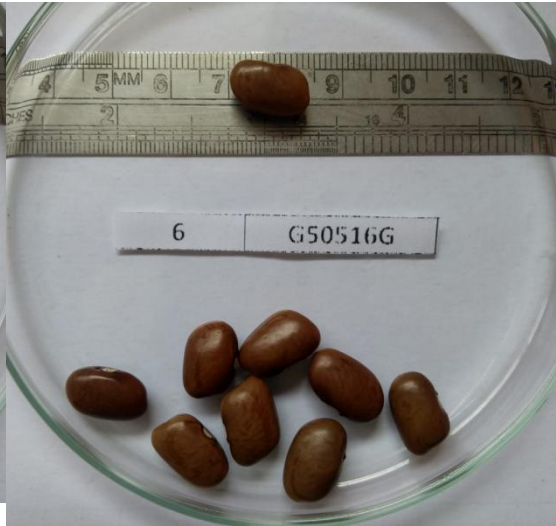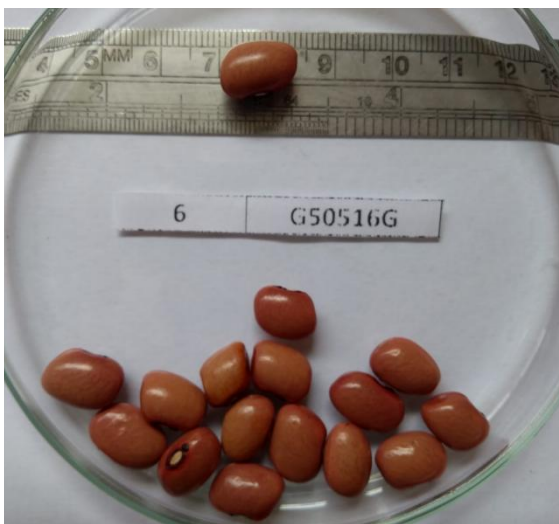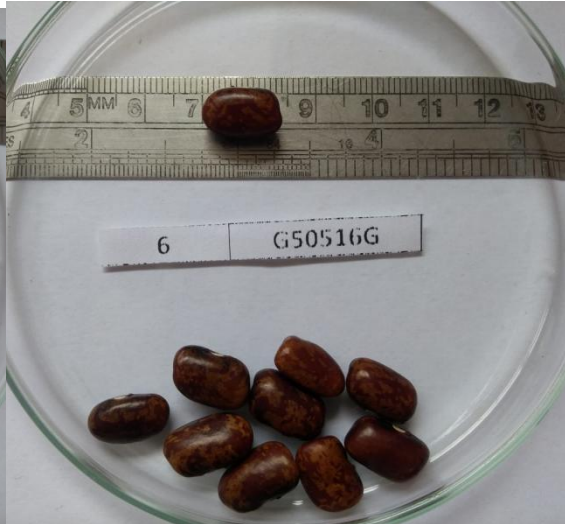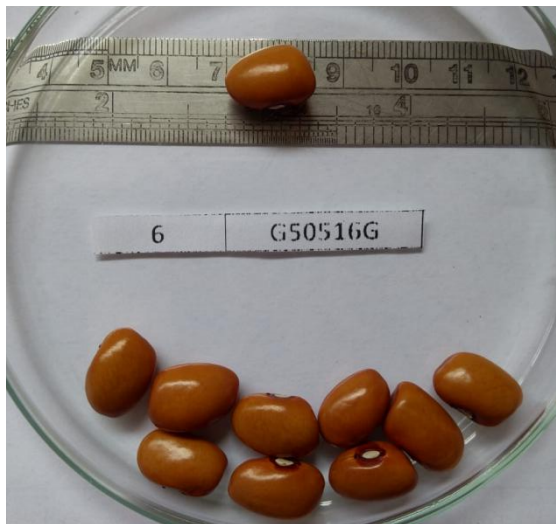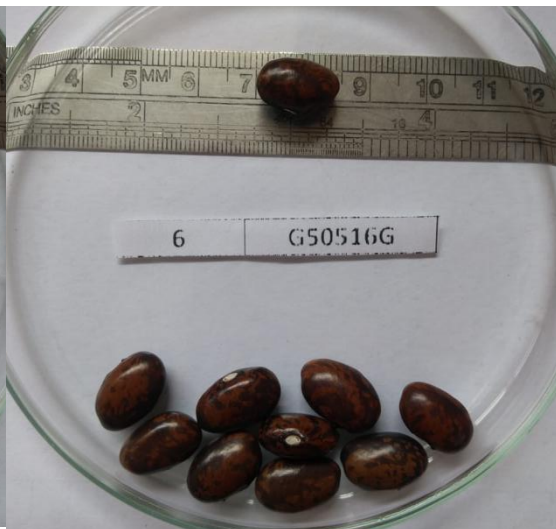

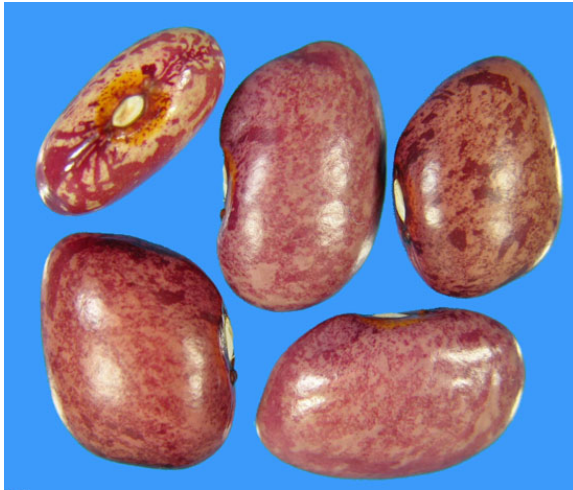

Sample 7 ID: G50516H (11)

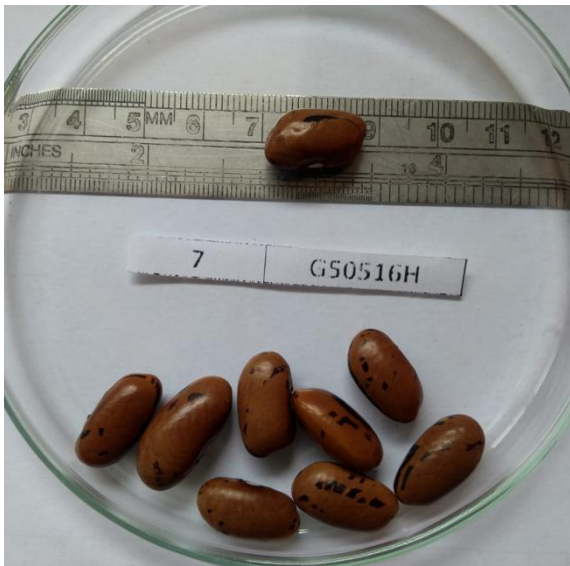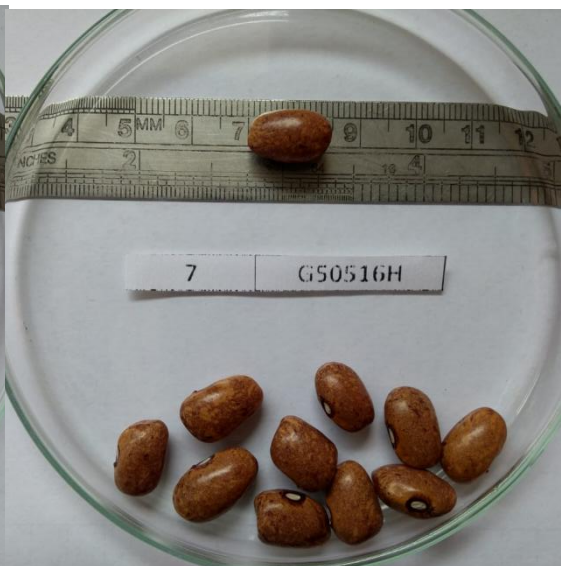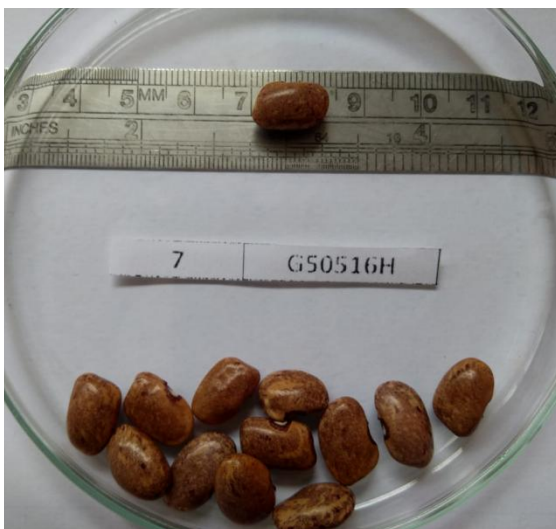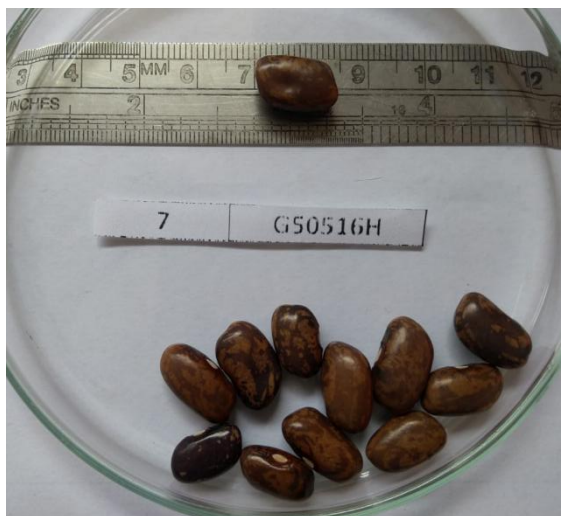



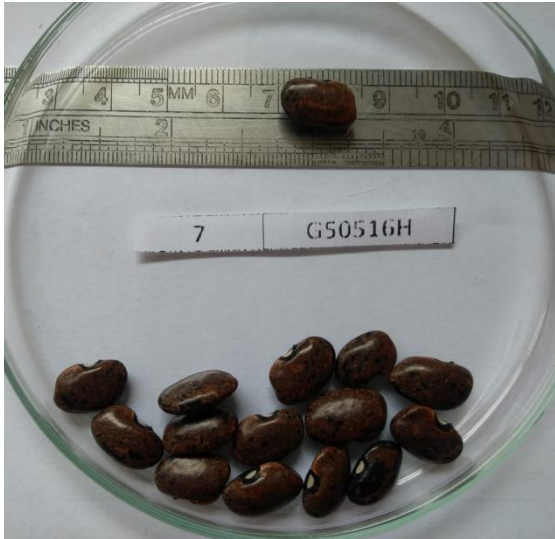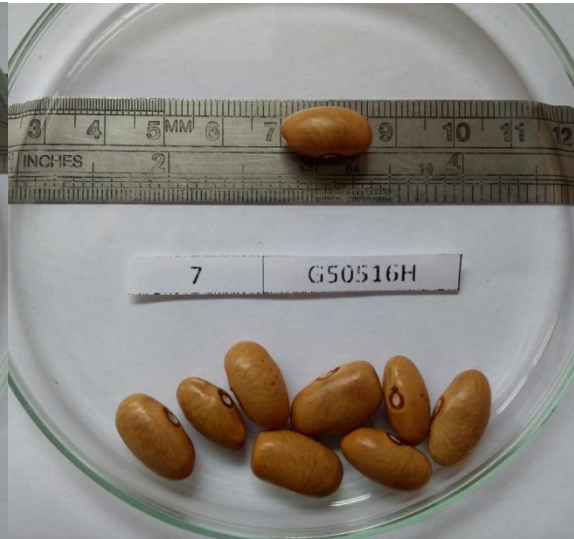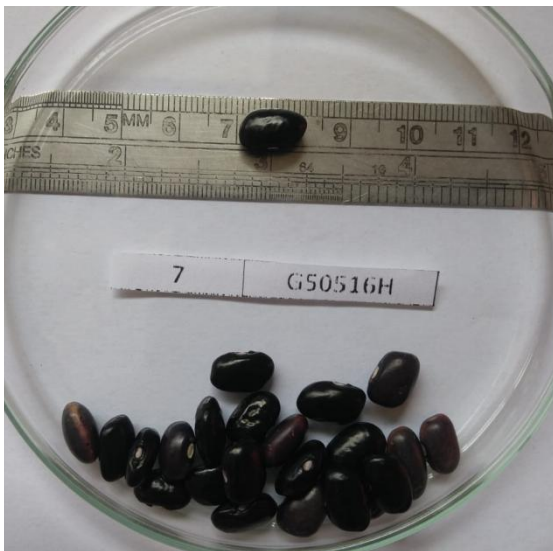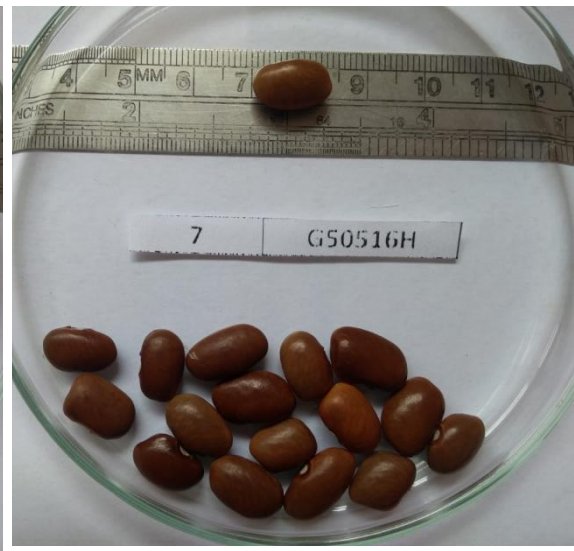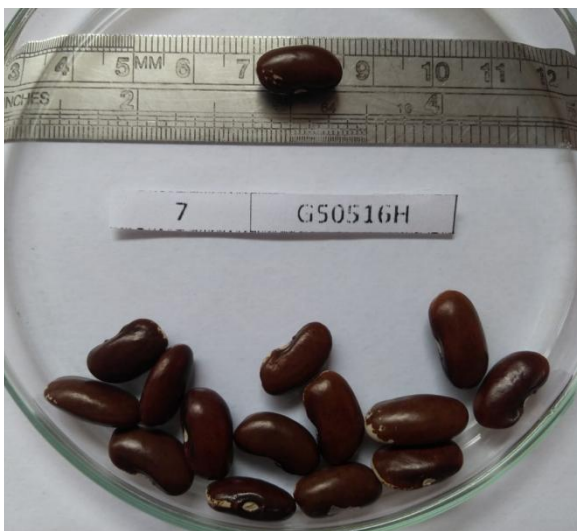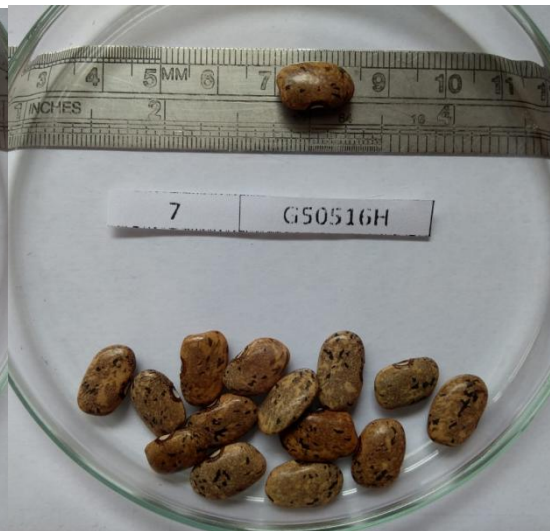

Chosen

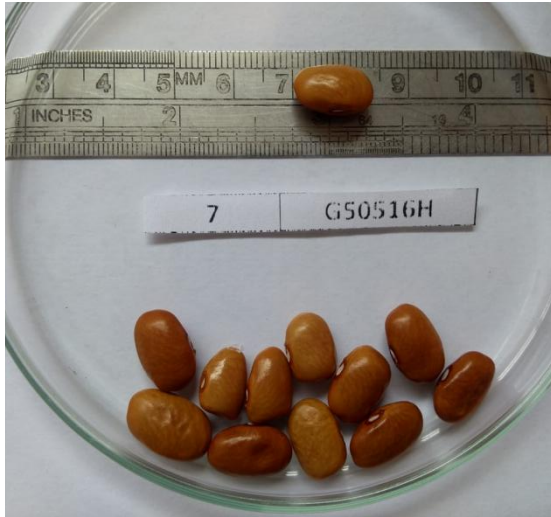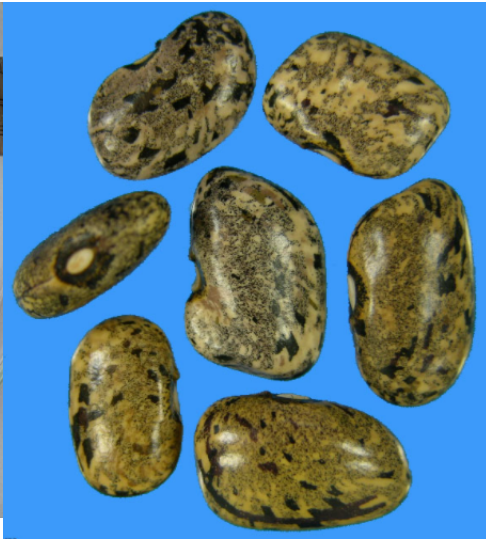

Sample 8 ID: G50516I (3)

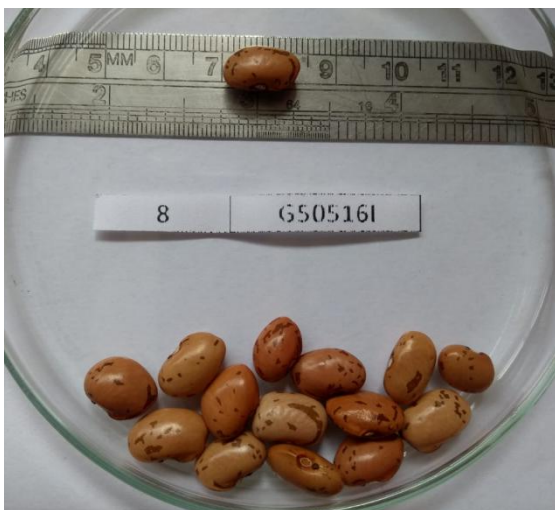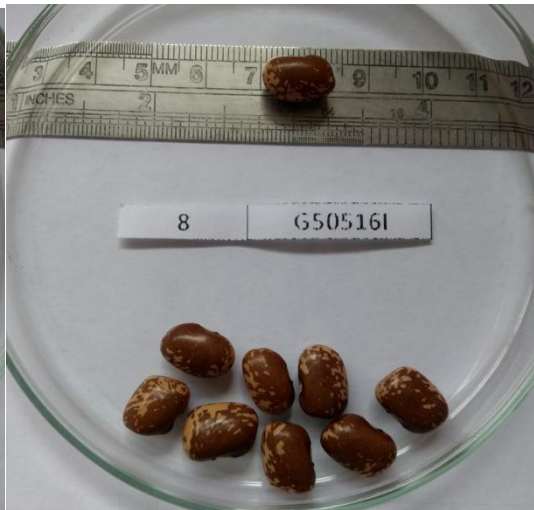

Chosen

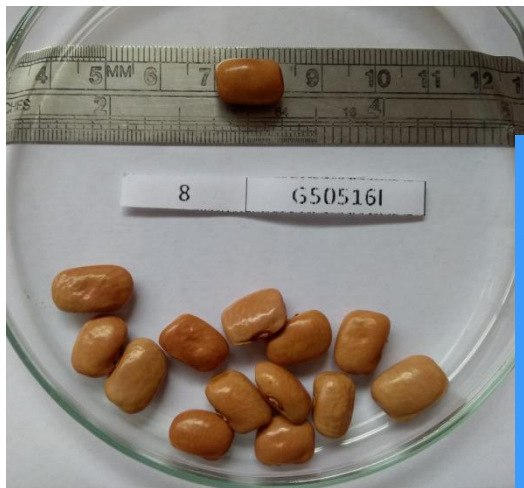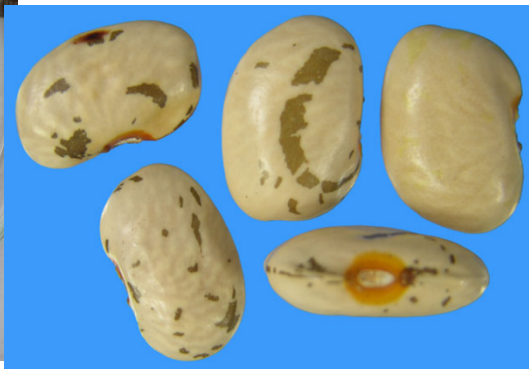



Sample 9 ID: G51285 (2)

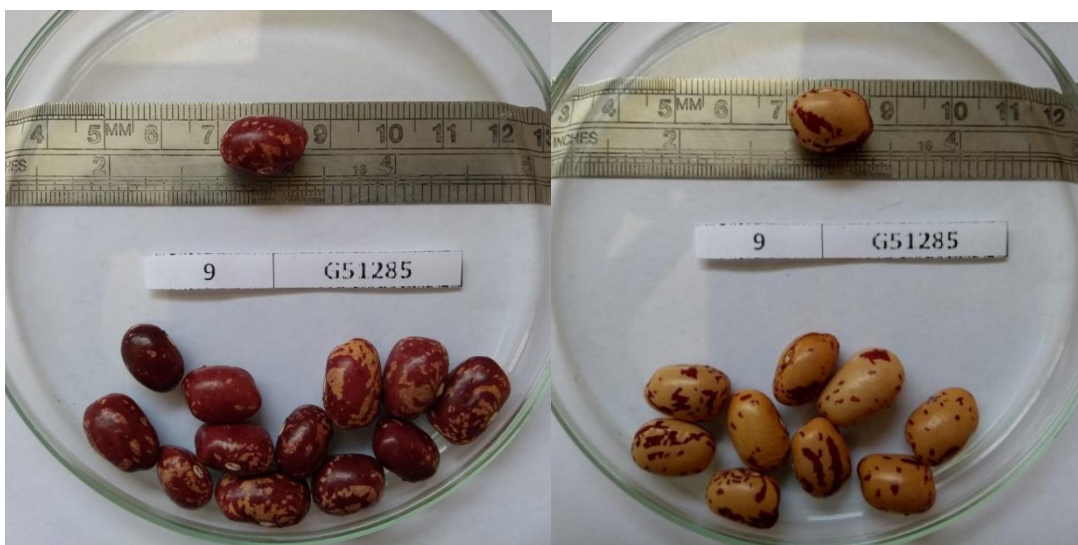

Chosen

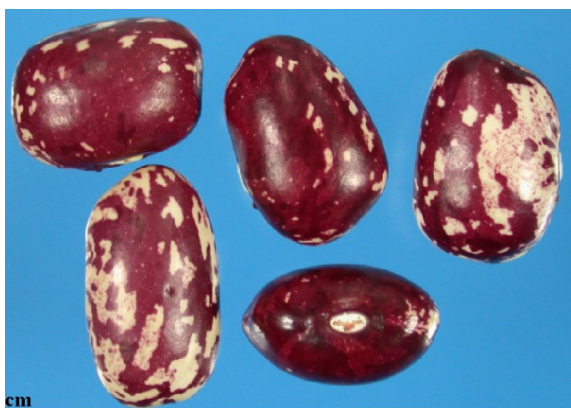

Sample 10 ID: G12671 (1)

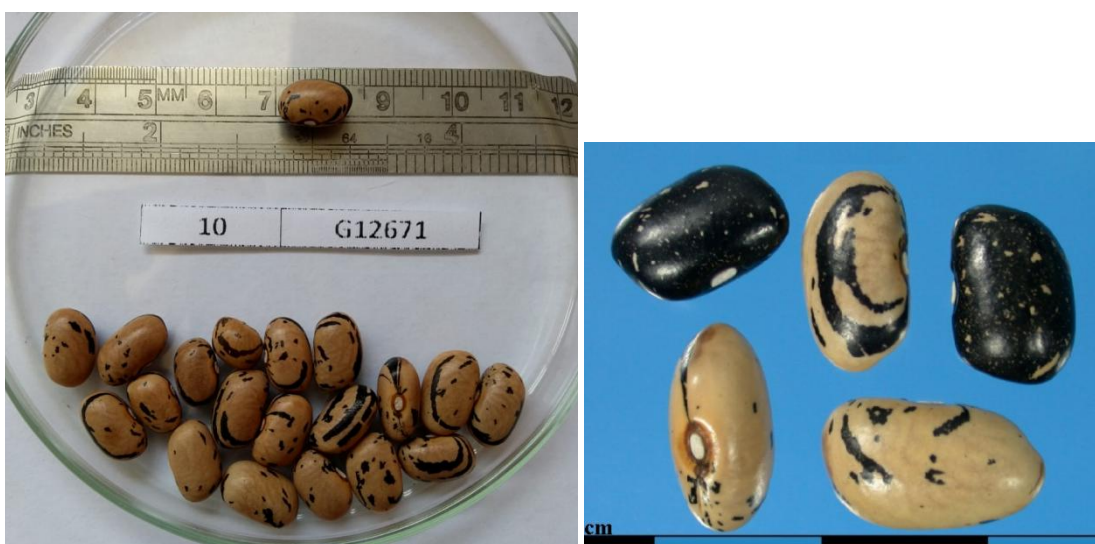

Sample 11 ID: G51313A (6)

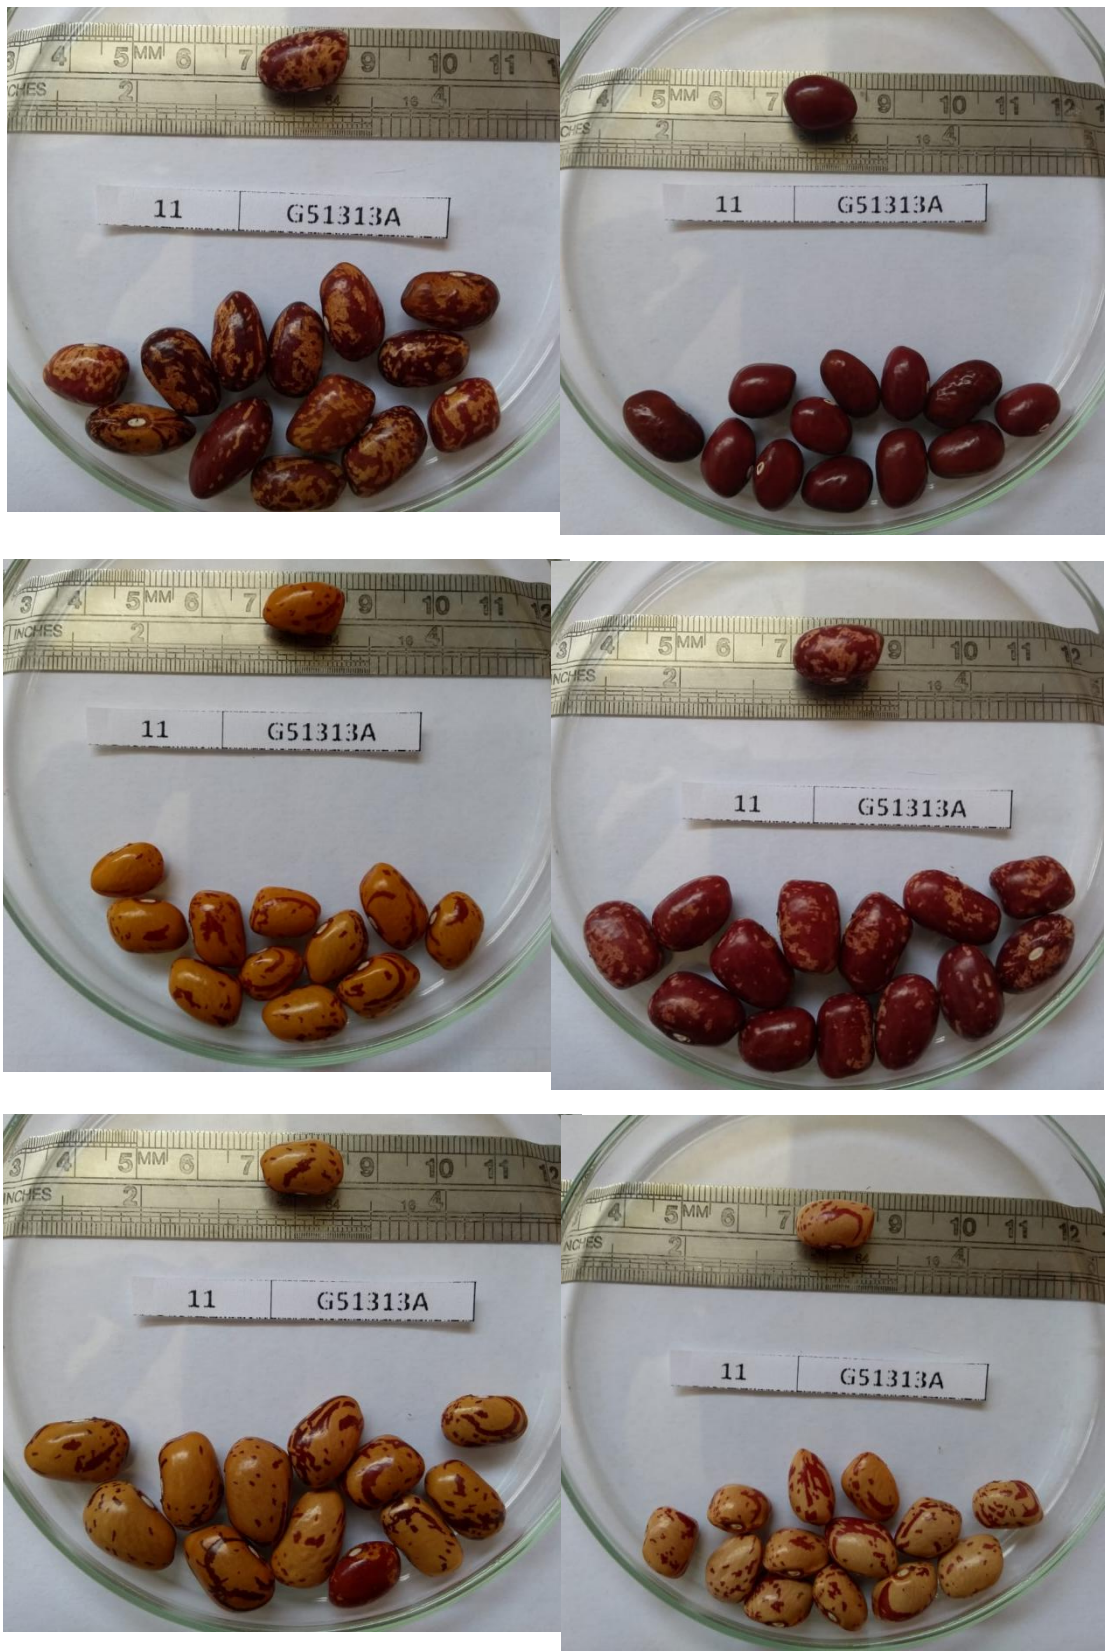

Chosen



Sample 12 ID: G12712 (1)

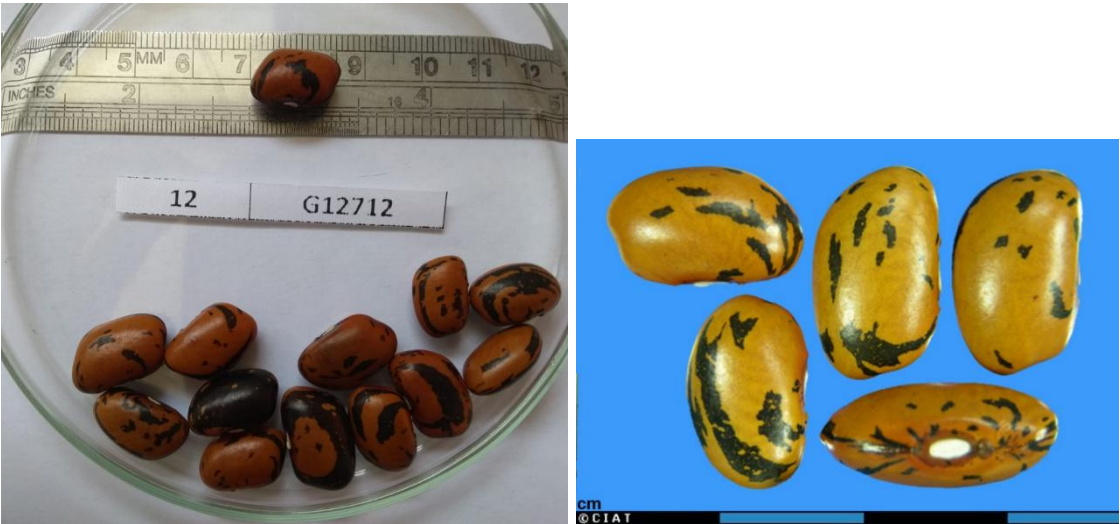

Sample 13 ID: G51285G (7)

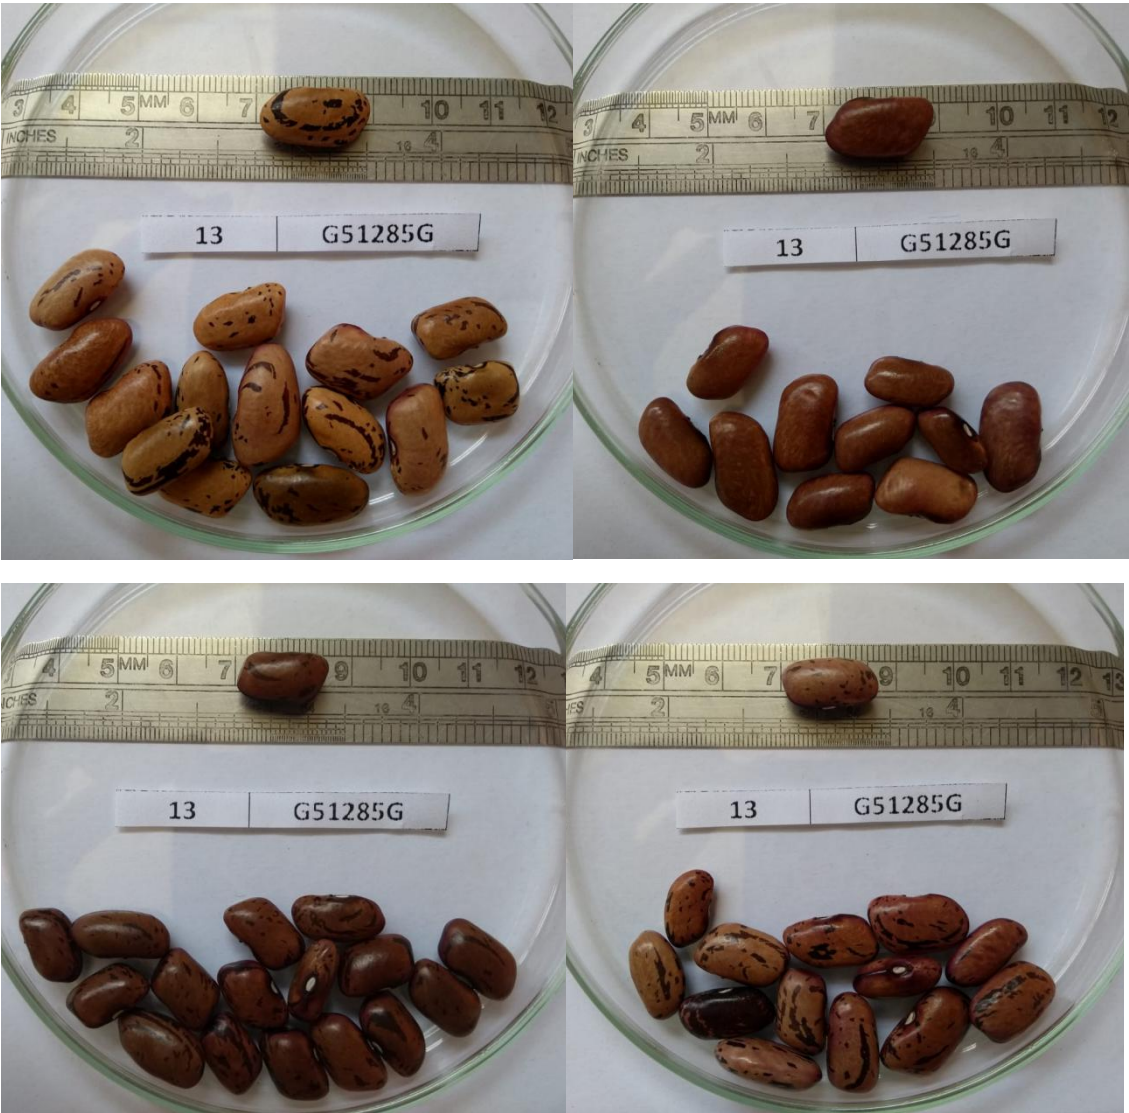

Chosen

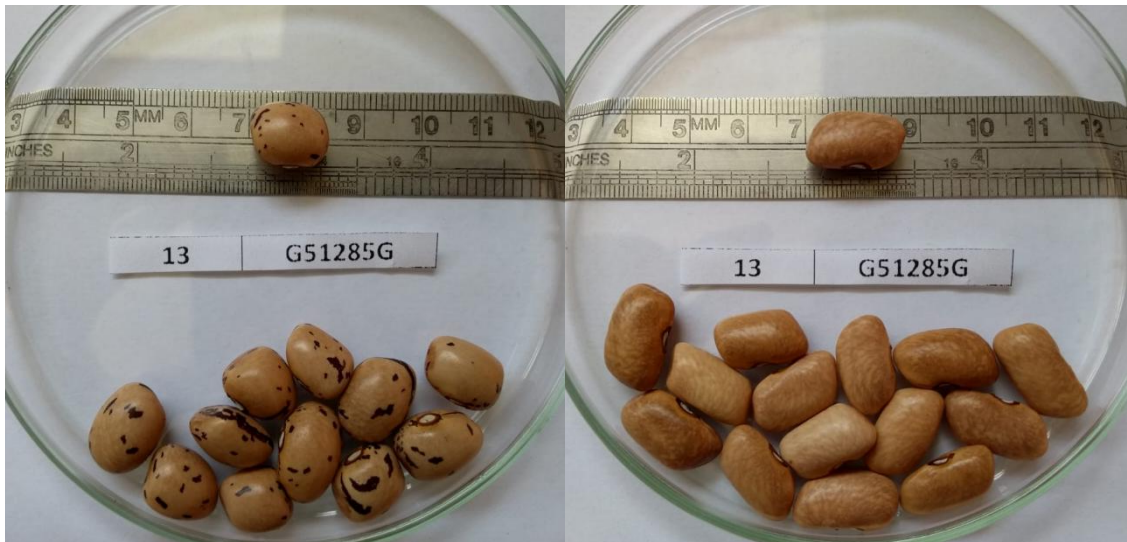

Chosen

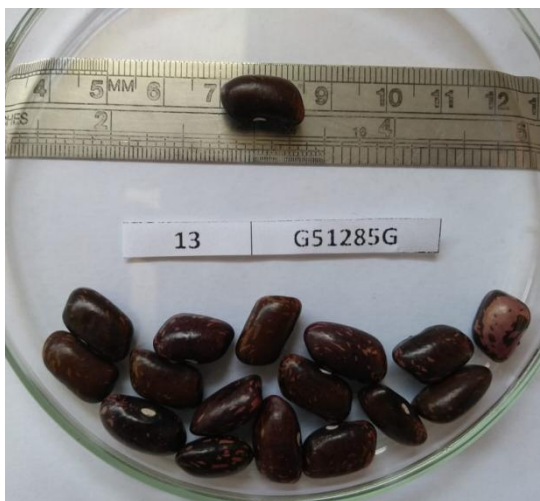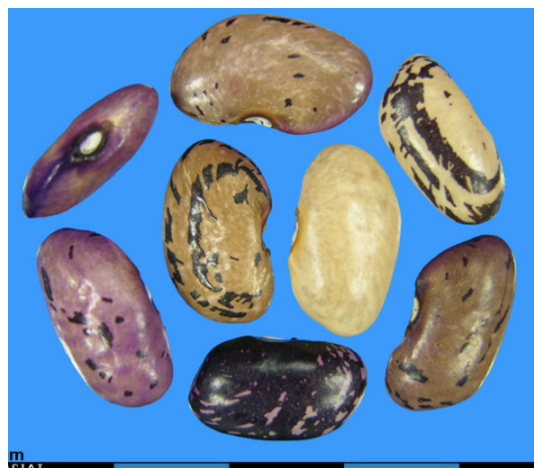

Sample 14 ID: G51285H (5)

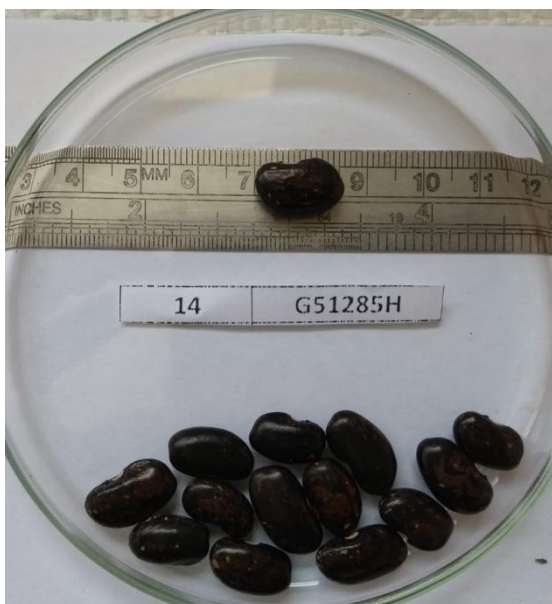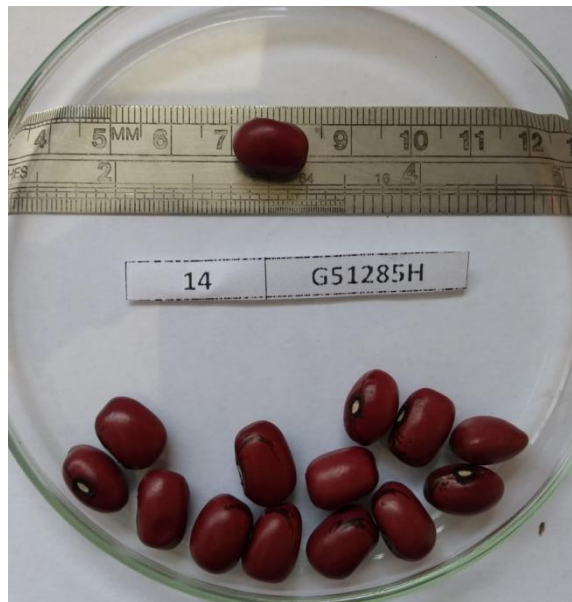



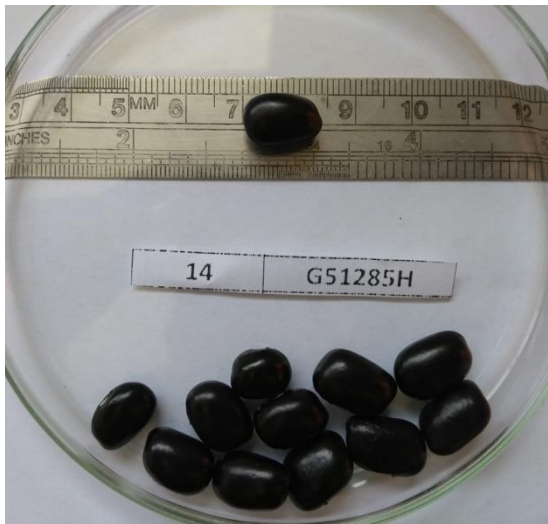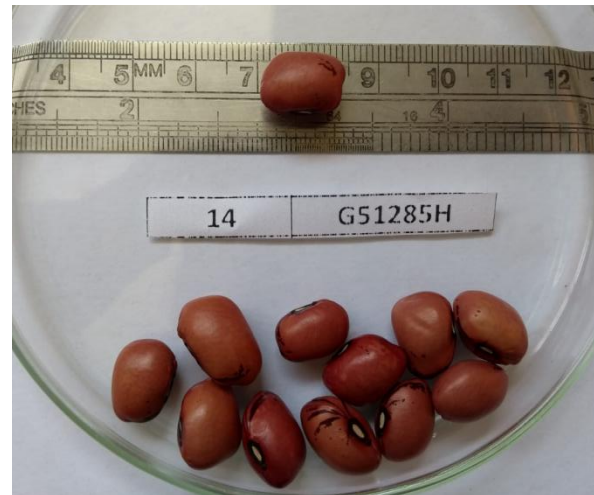

Chosen

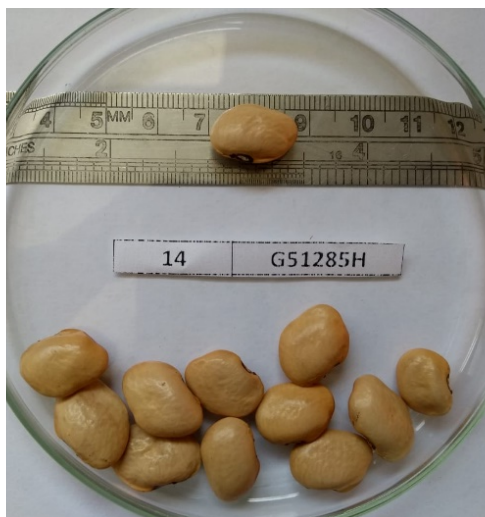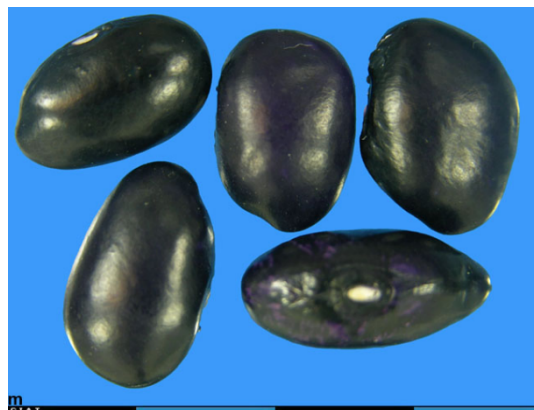

Sample 15 ID: G51433 (1)

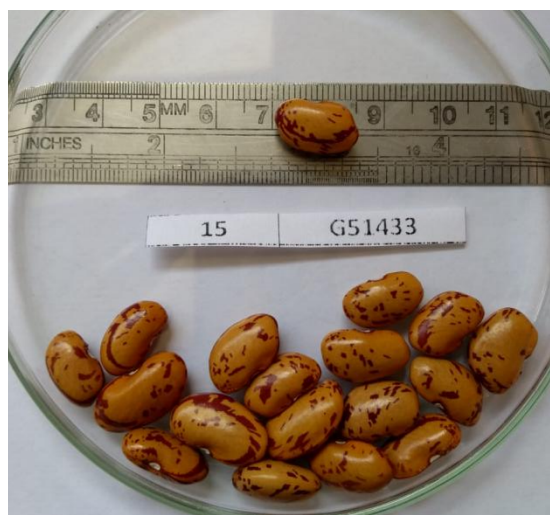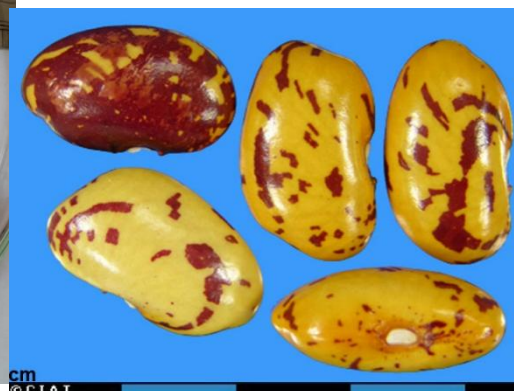

Sample 16 ID: G51013 (2)

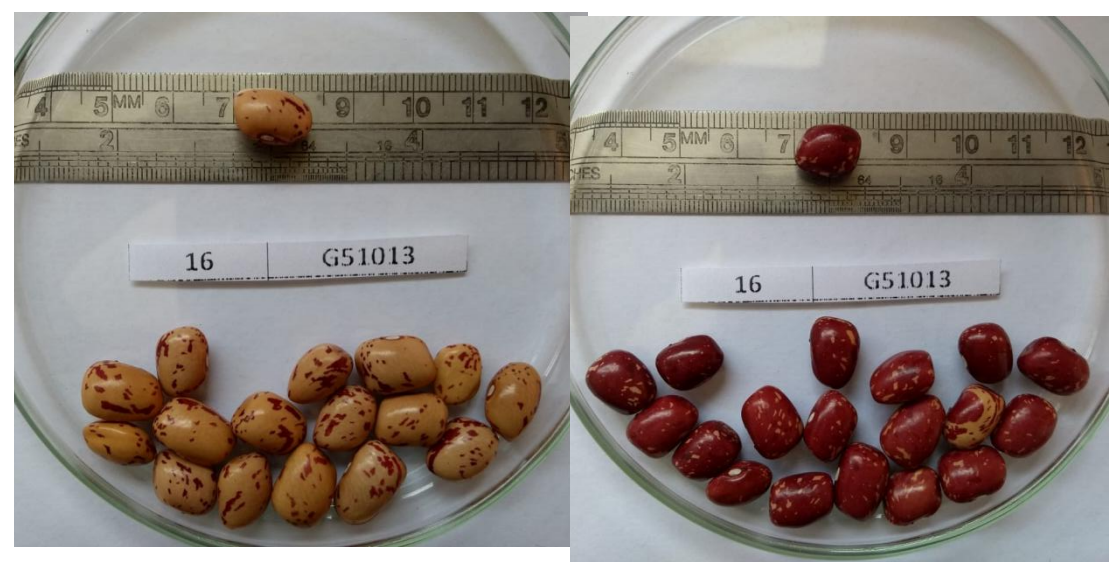

Chosen

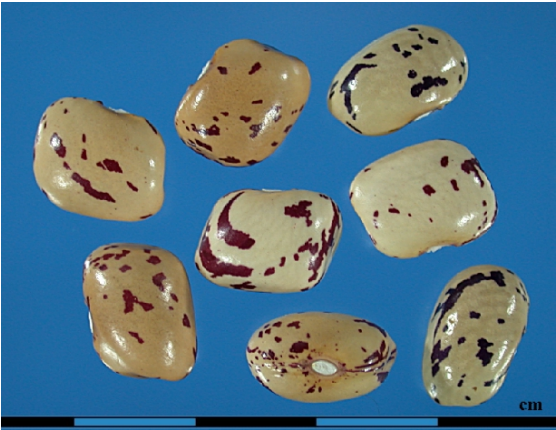

Sample 17 ID: G51018 (3)

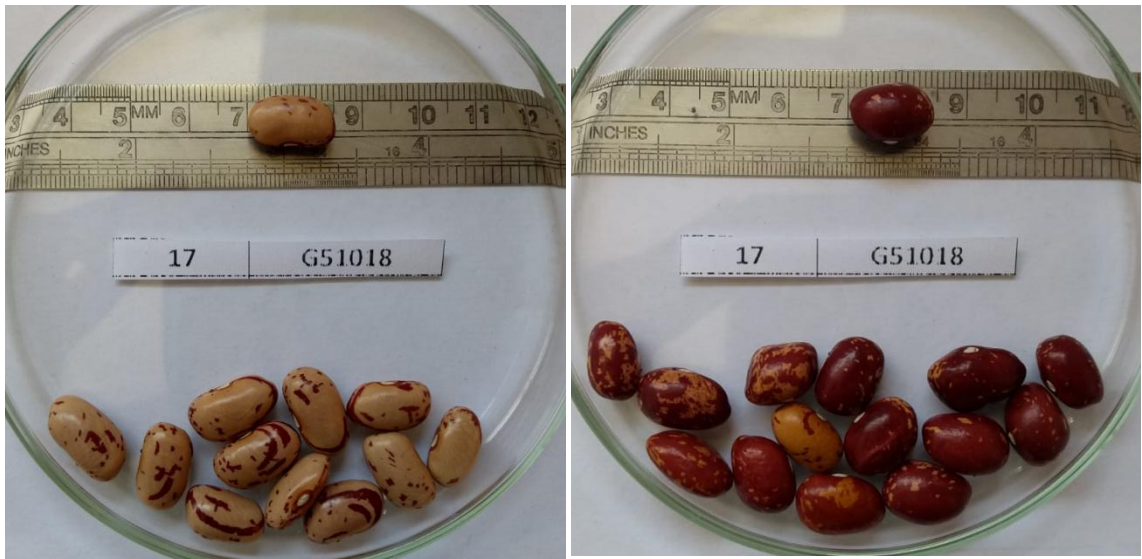



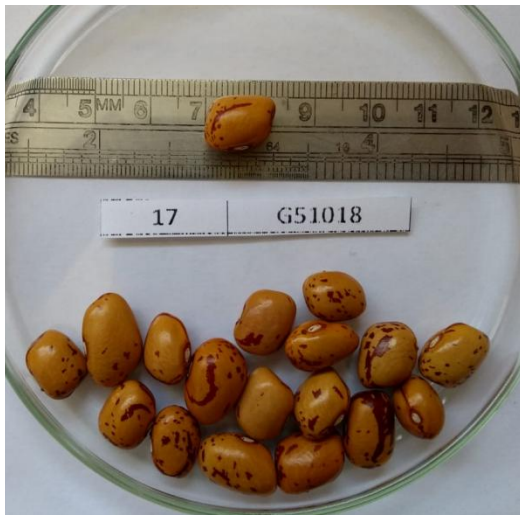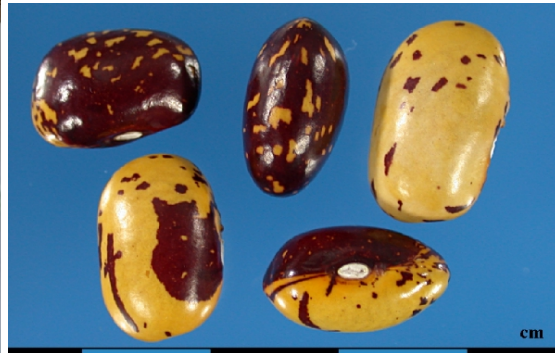

Chosen

Sample 18 ID: G51285C (7)

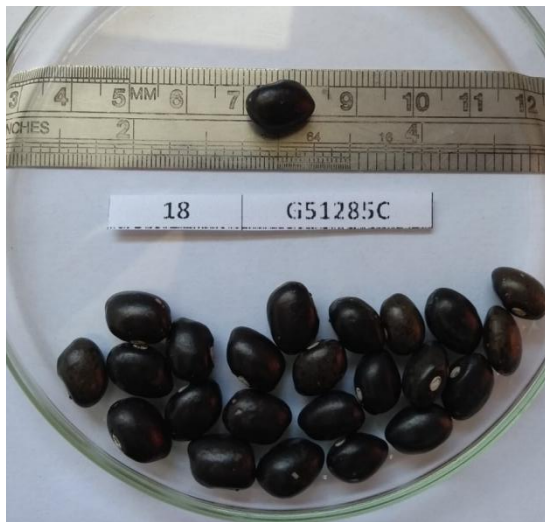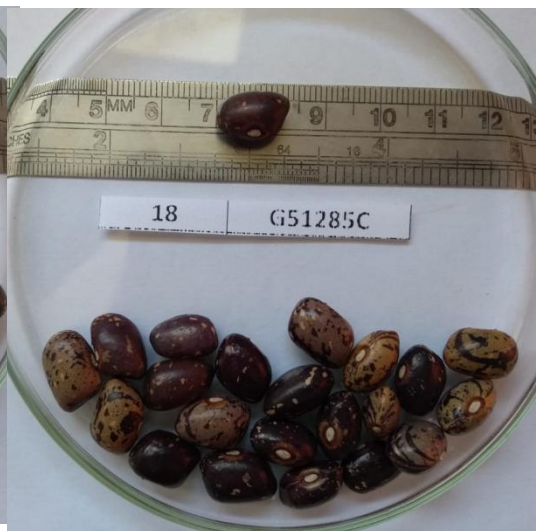

Chosen

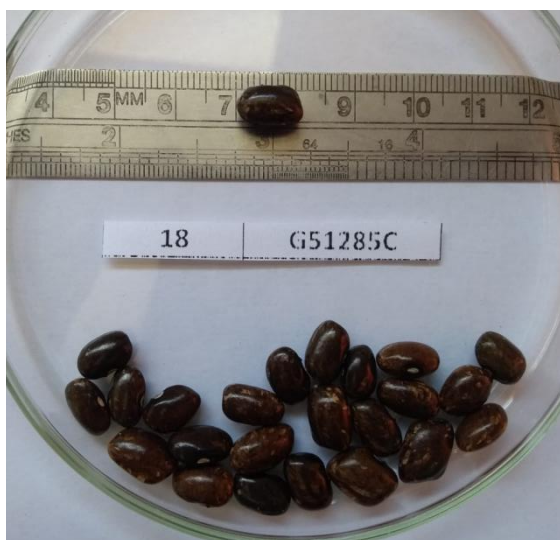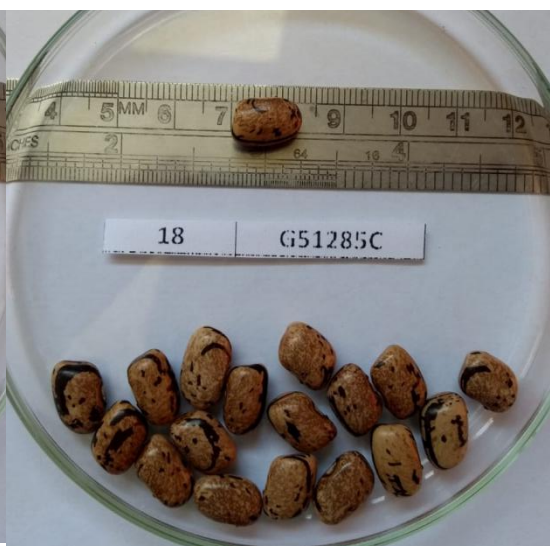

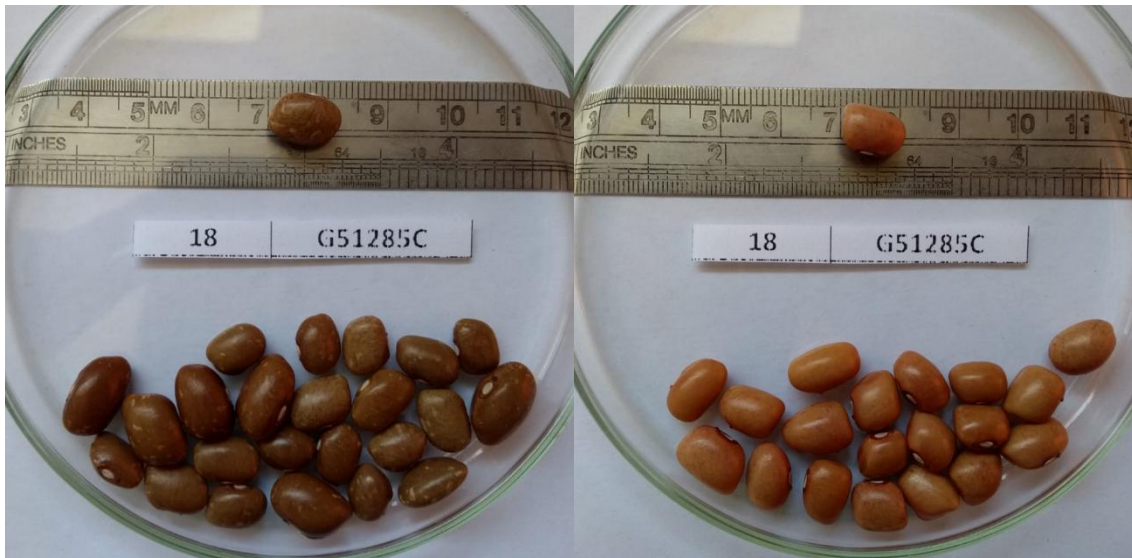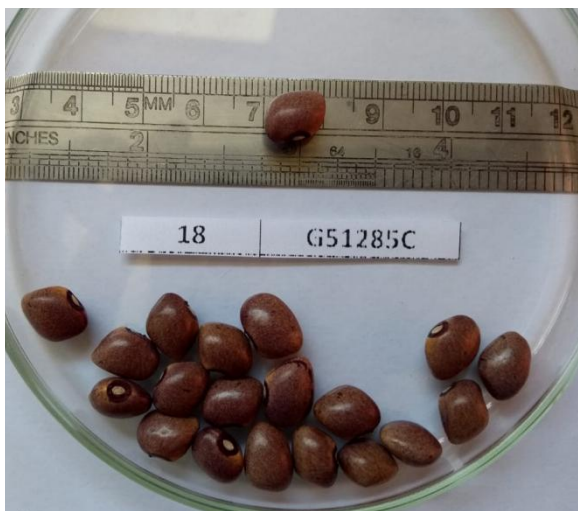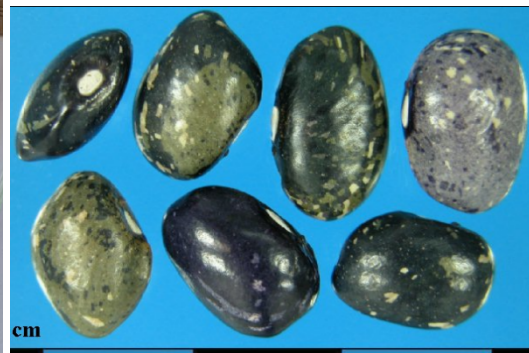

Sample 19 ID: G50516A (1)

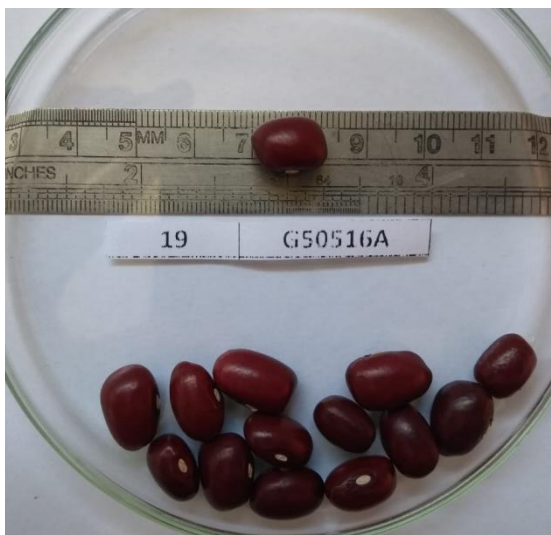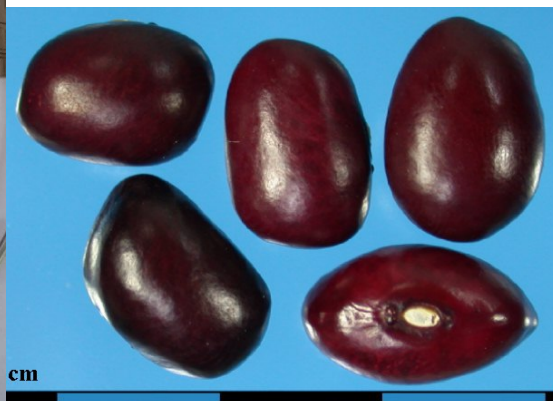



Sample 20 ID: G1270G (2)

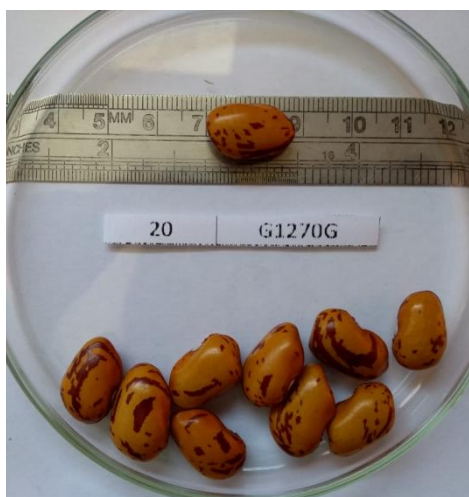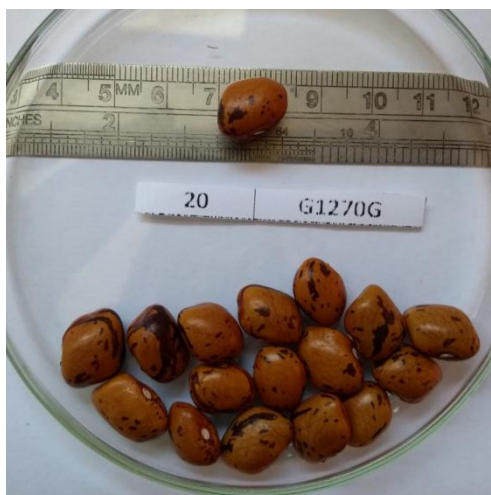

Chosen

Sample 21 ID: G5084A (2)

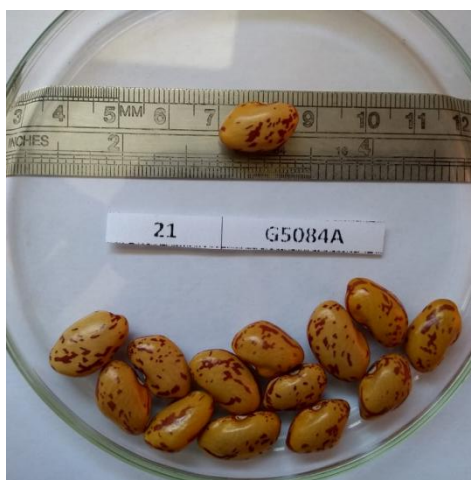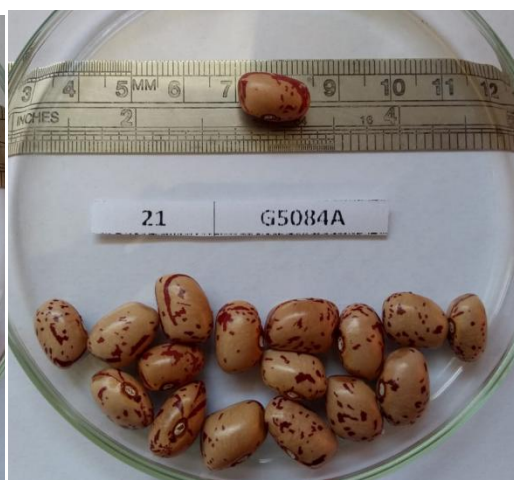

Chosen

Sample 22 ID: G50840B (2)

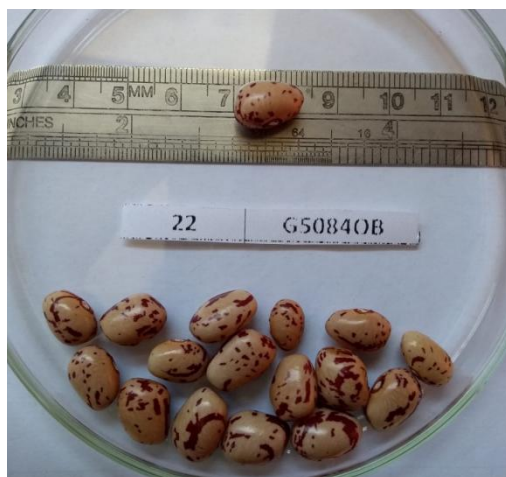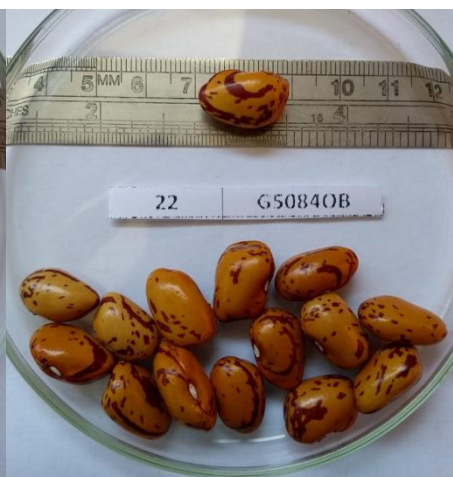

Chosen

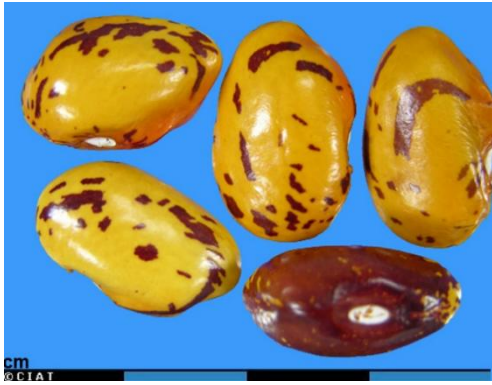

Sample 23 ID: G50997 (1)

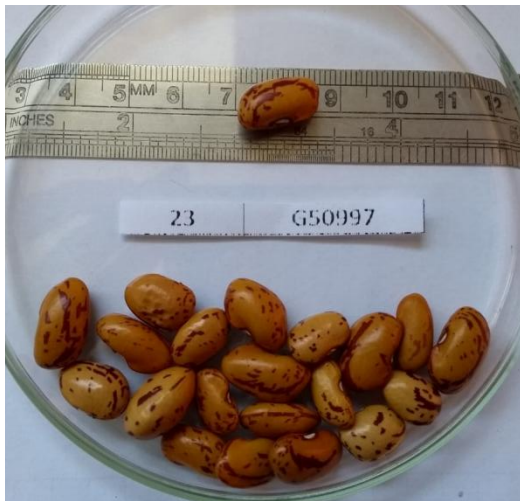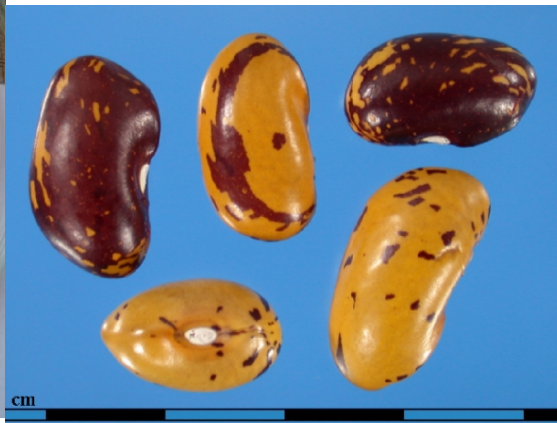

Sample 24 ID: G50997B (4)

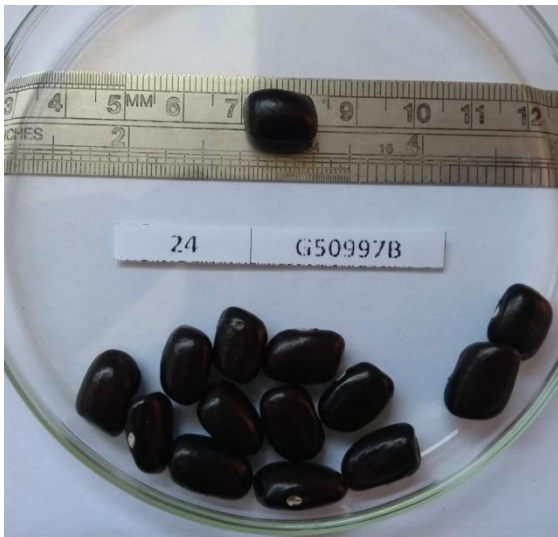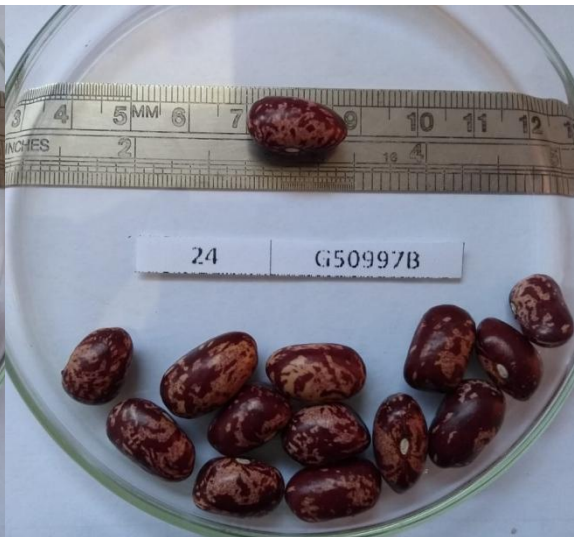



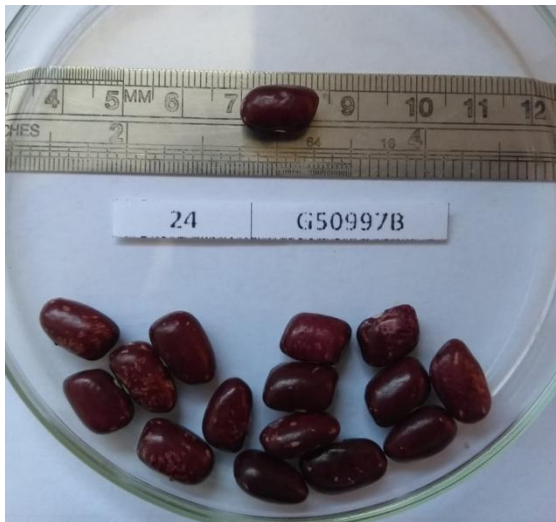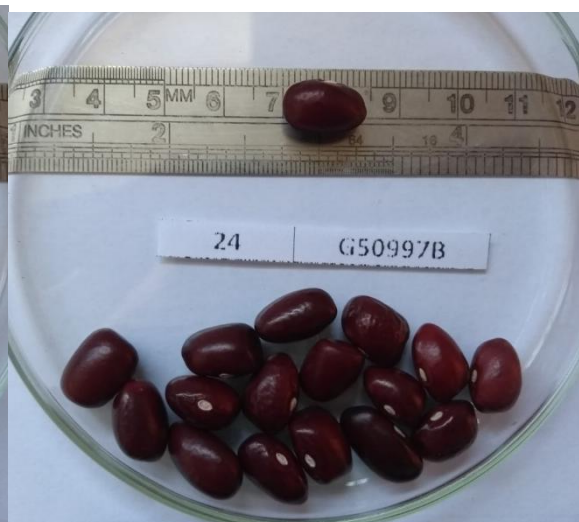

Chosen

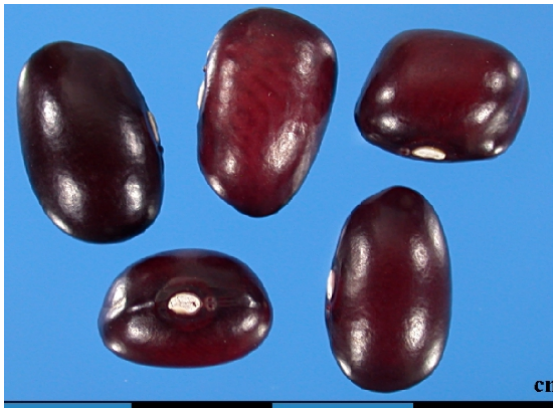

Sample 26 ID: G916 (1)

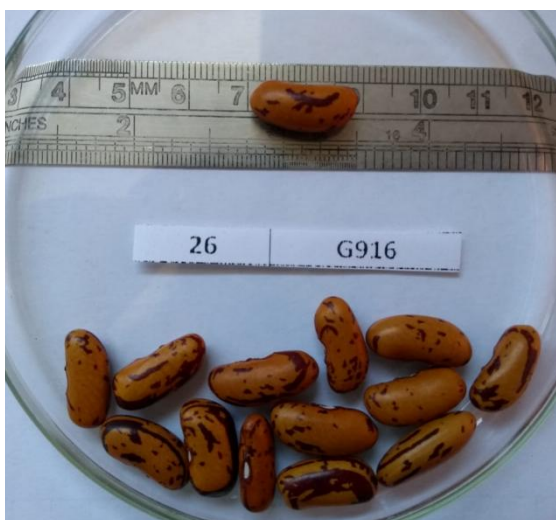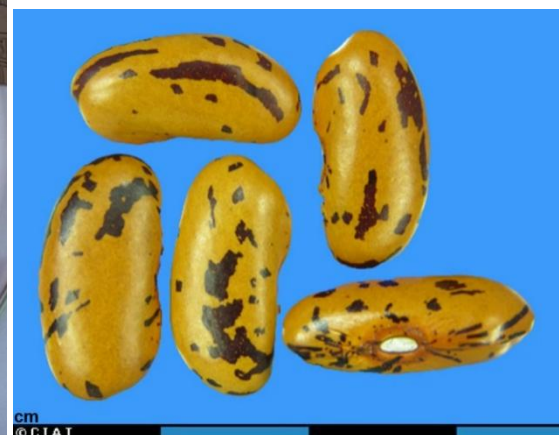

Sample 29 ID: G50516S (1)

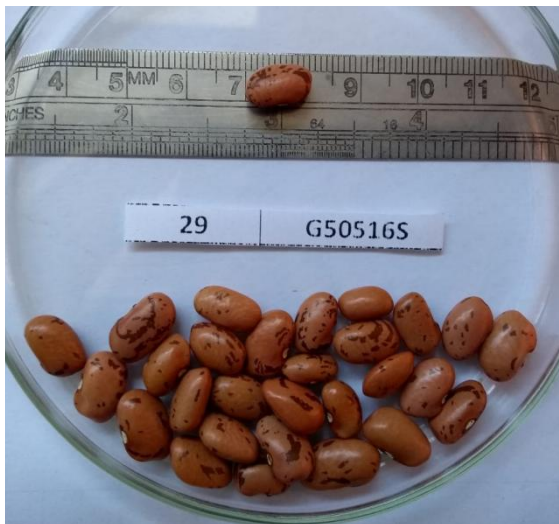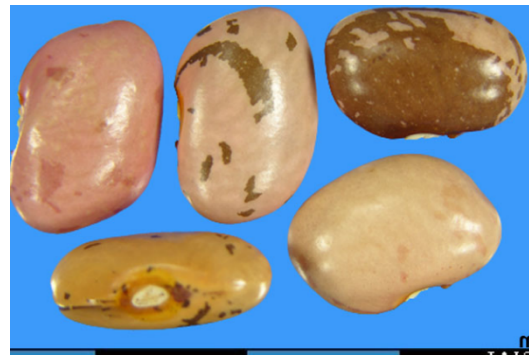

Sample 30 ID: G50516Q (6)

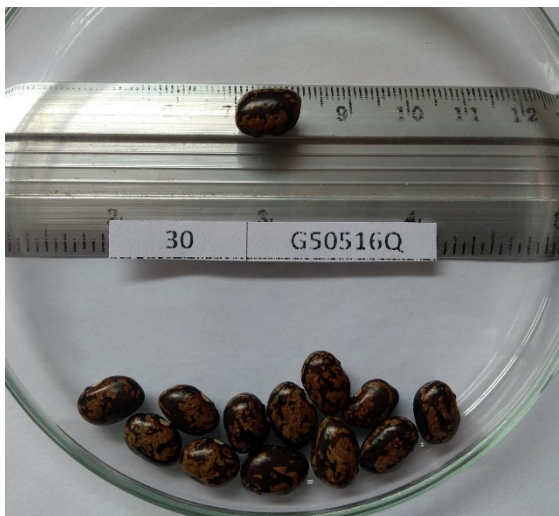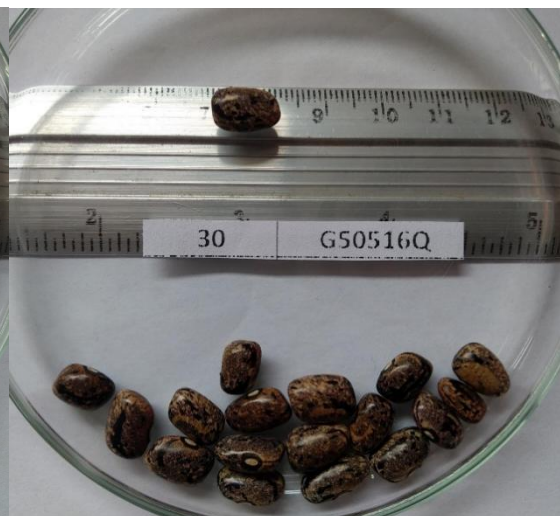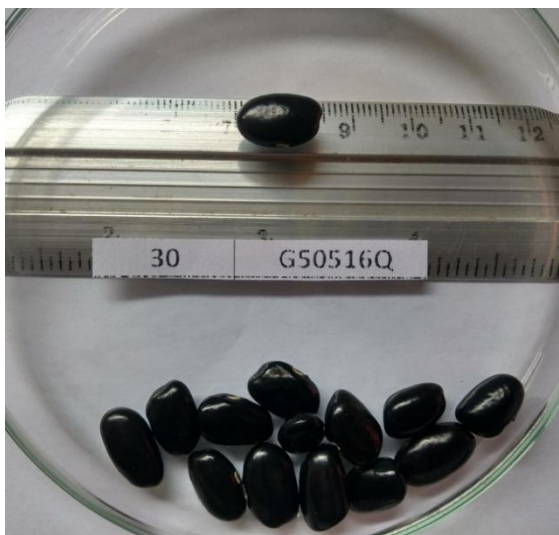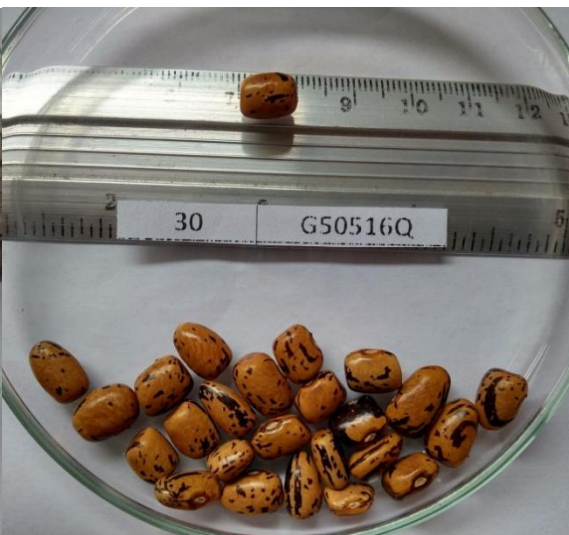

Chosen



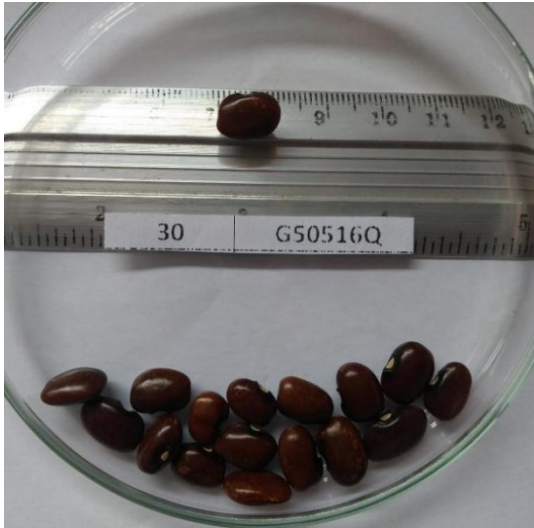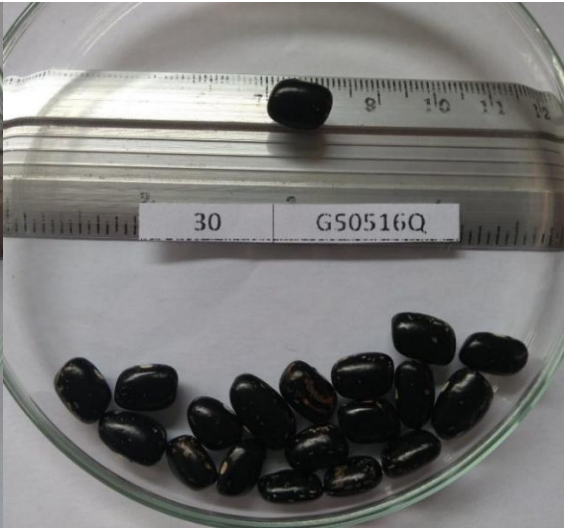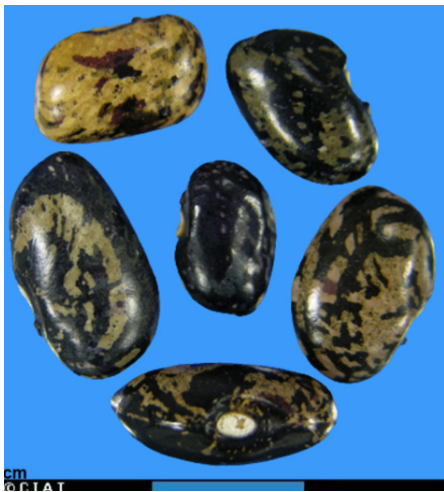

Sample 31 ID: G50516P (10)

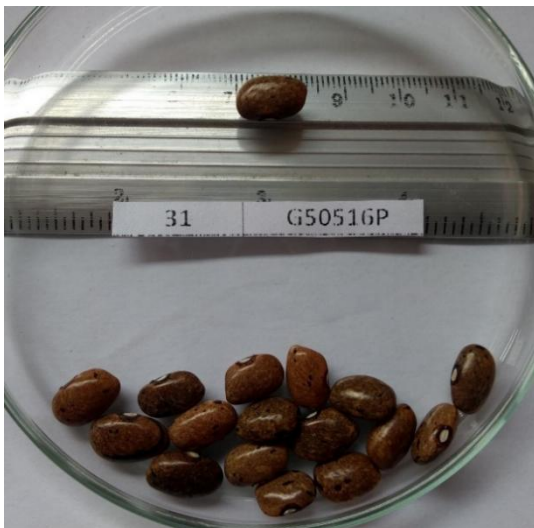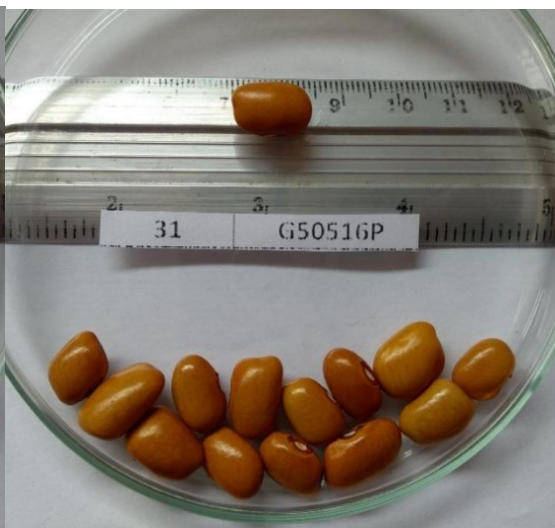

Chosen

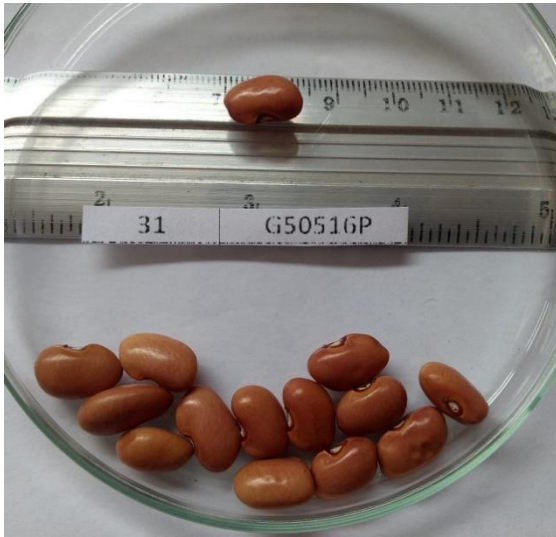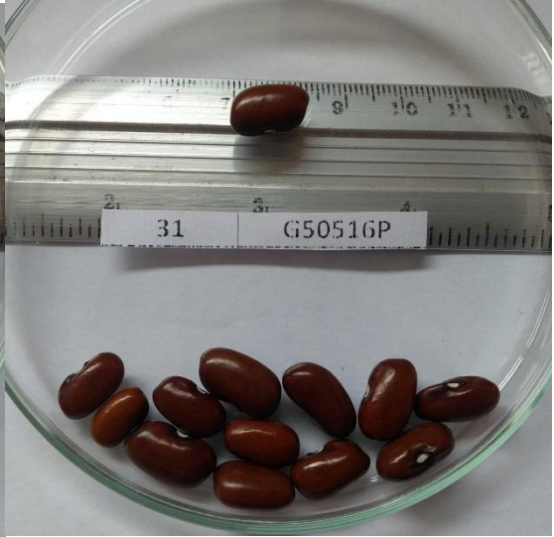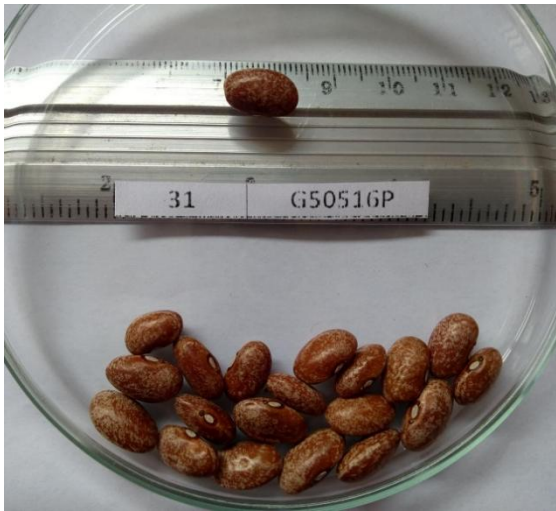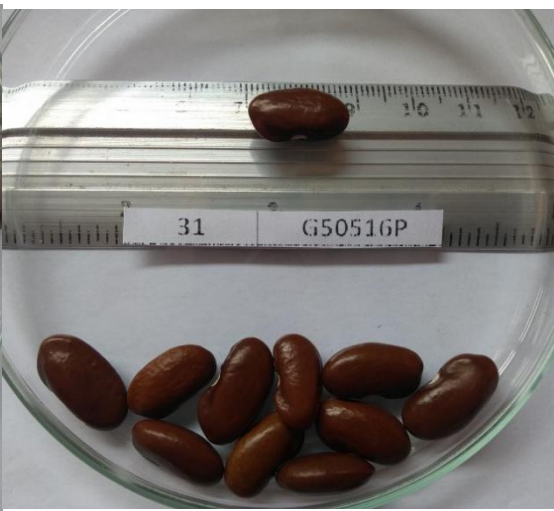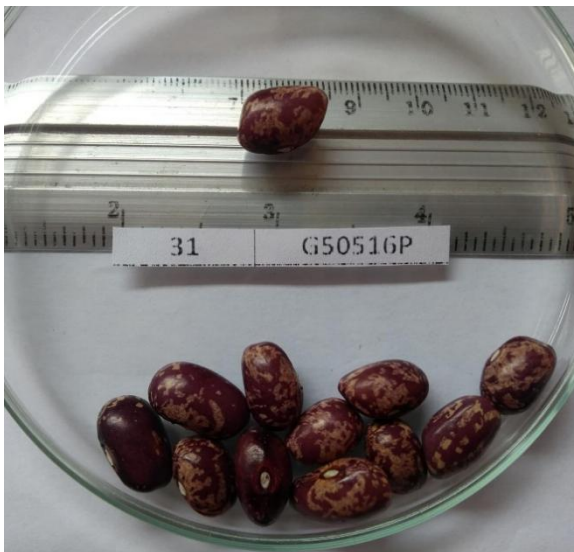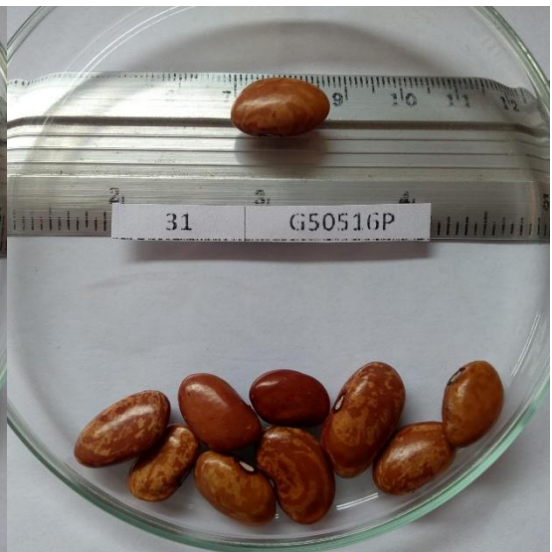



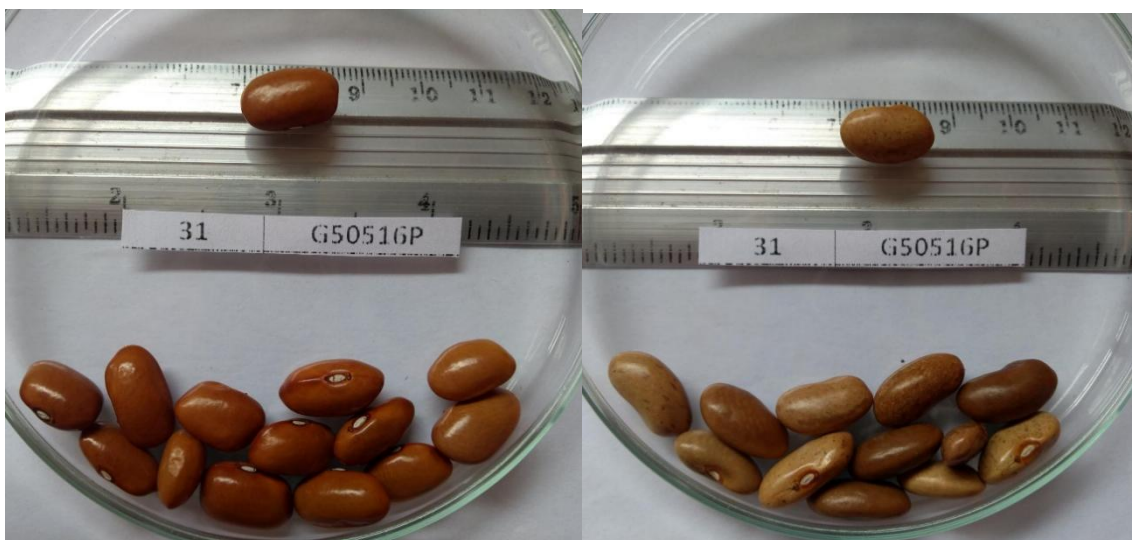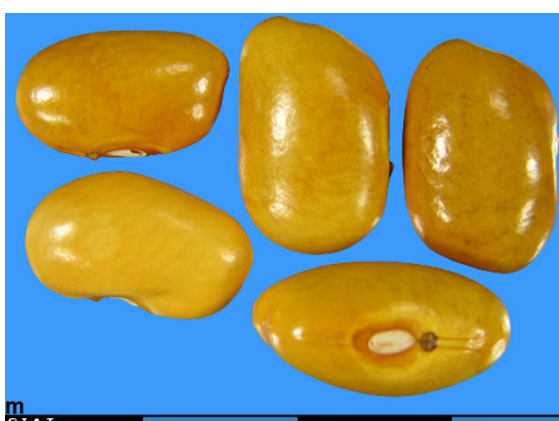

Sample 32 ID: G505160 (7)

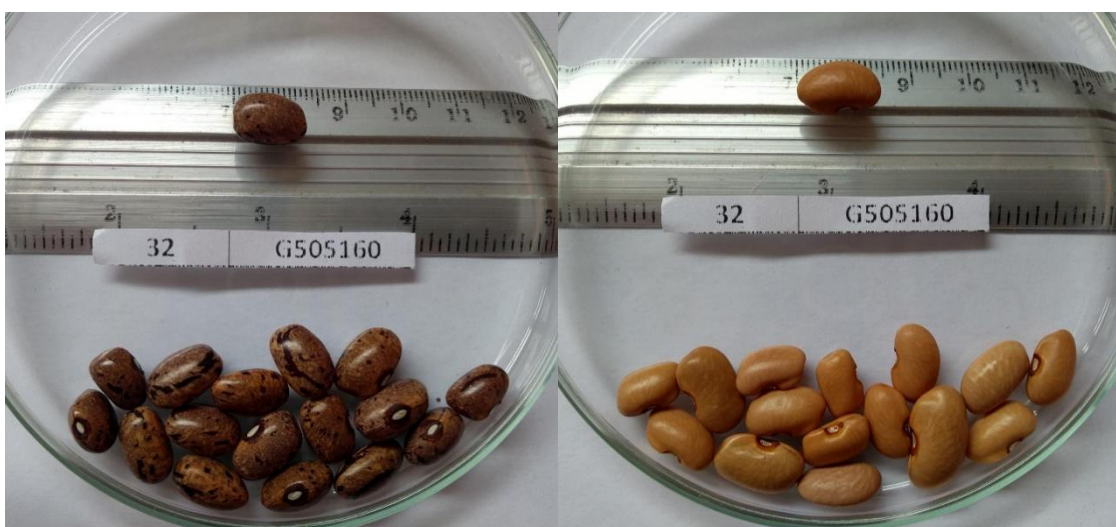

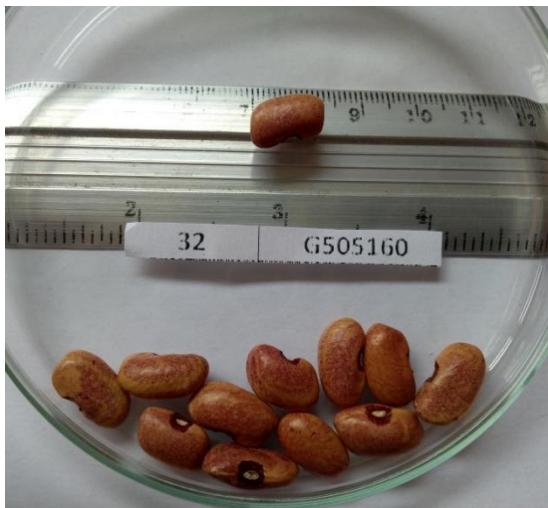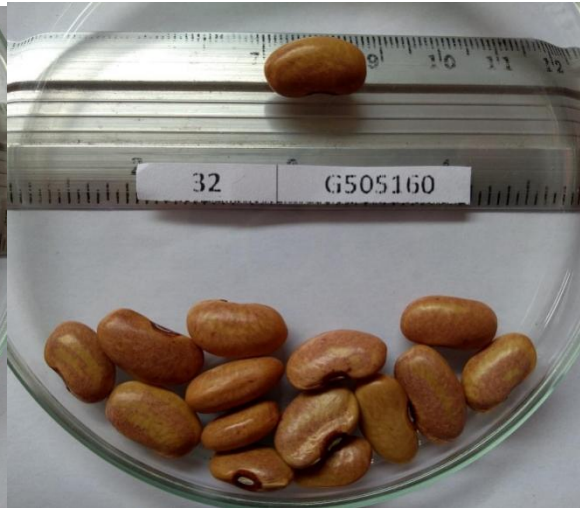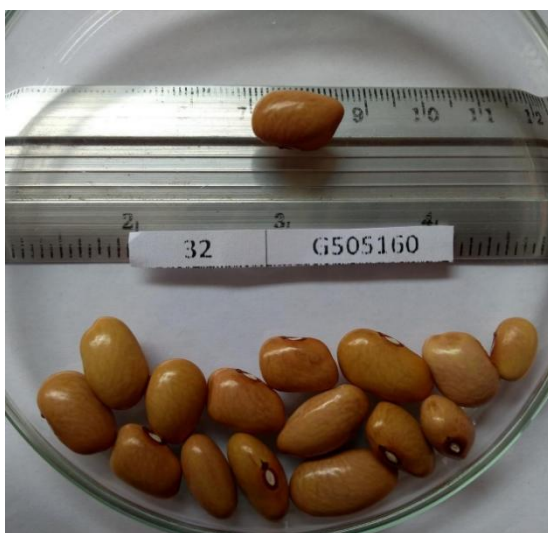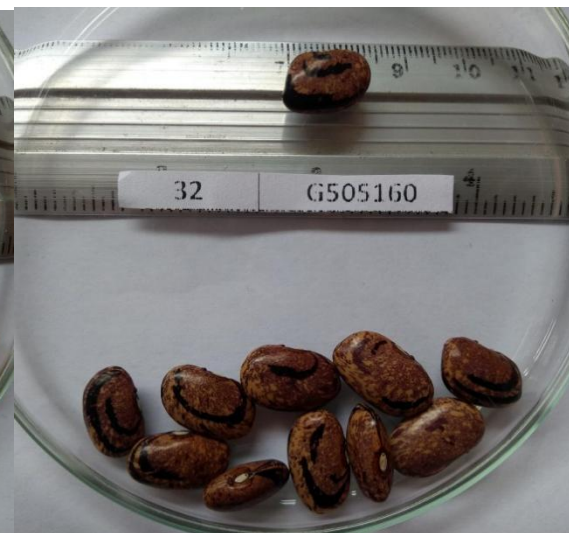

Chosen

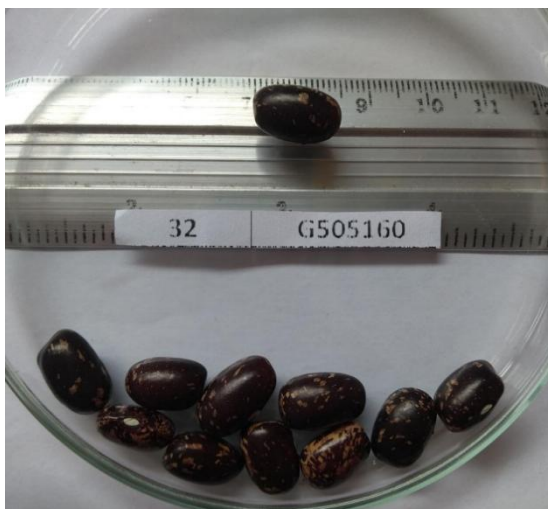



Sample 33 ID: G50516T (7)

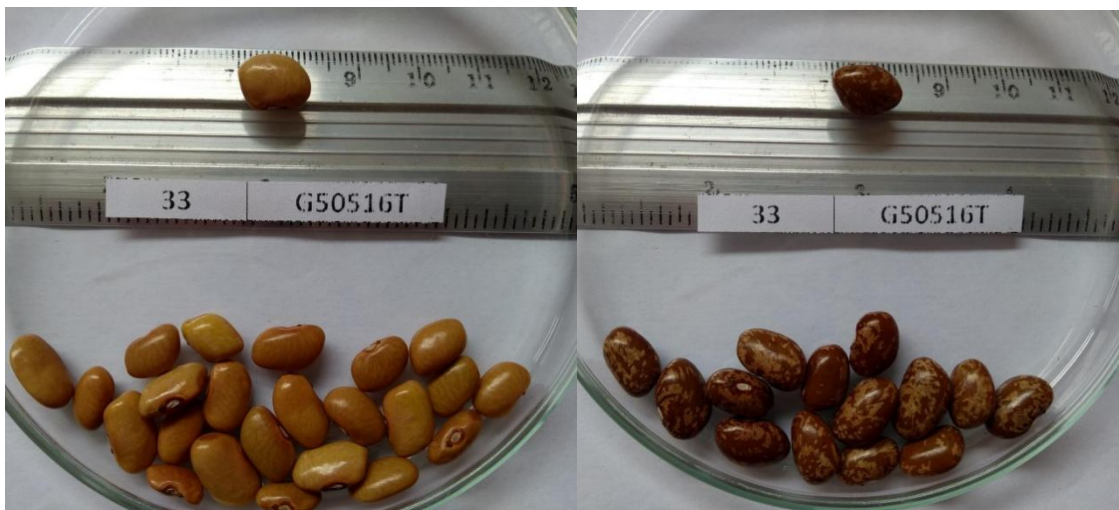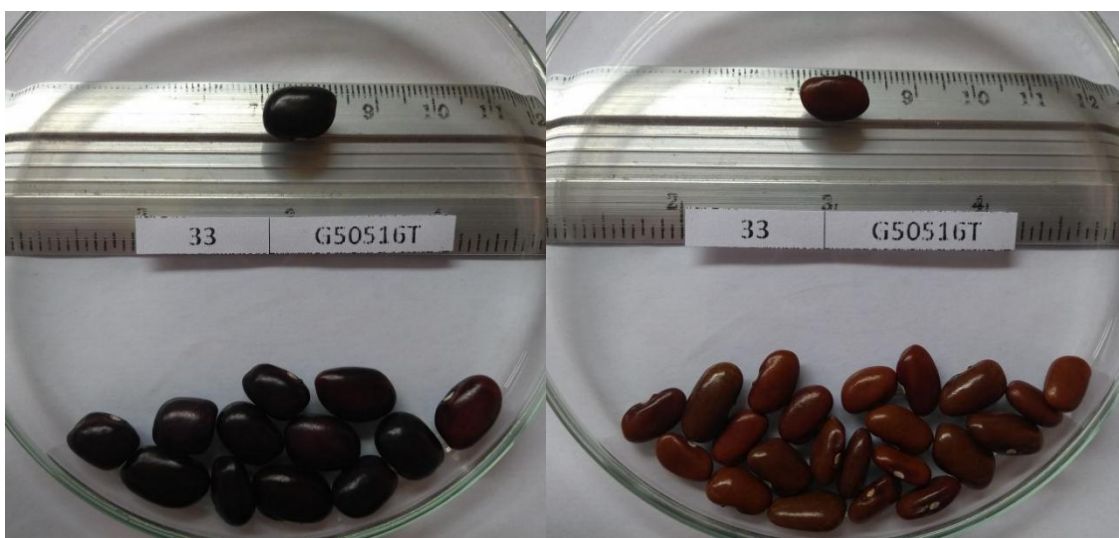

Chosen

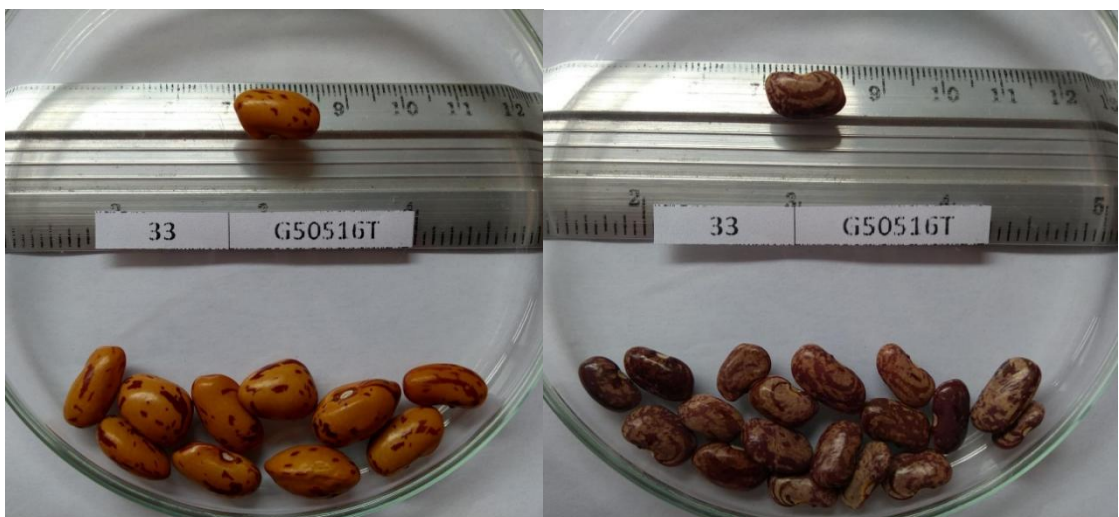

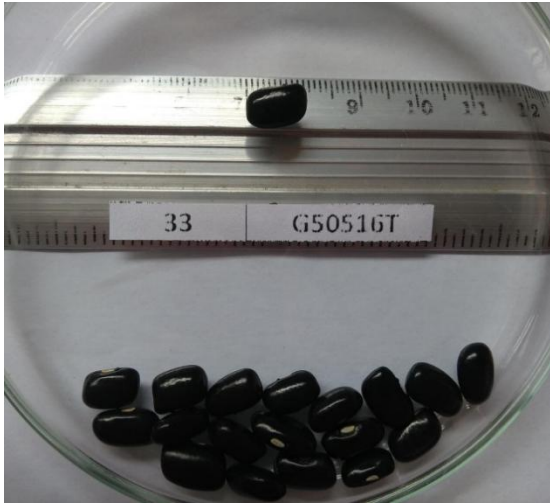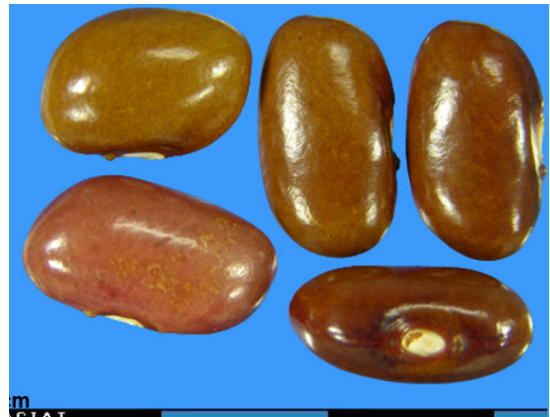

Sample 34 ID: G50516U (4)

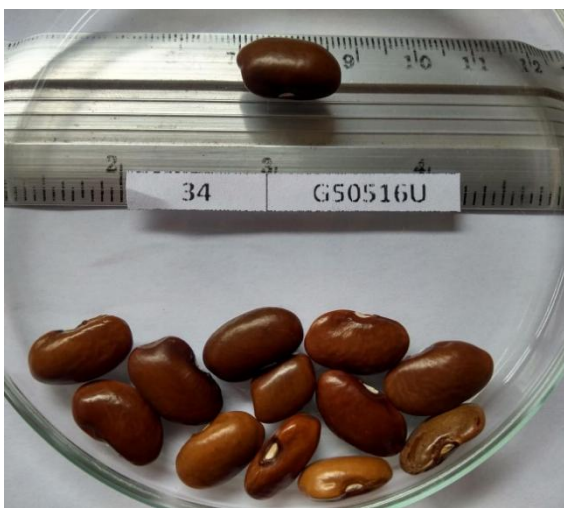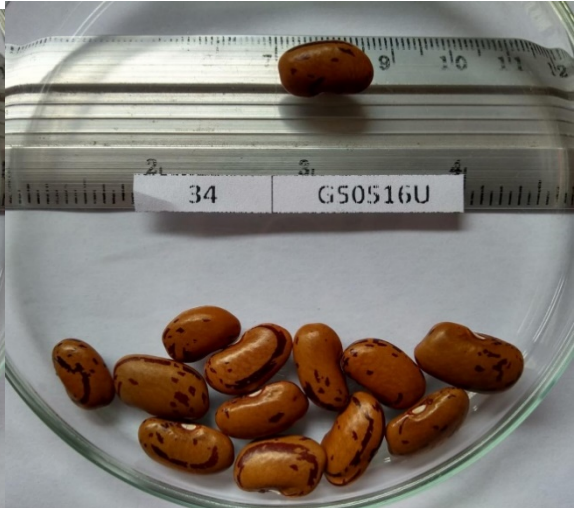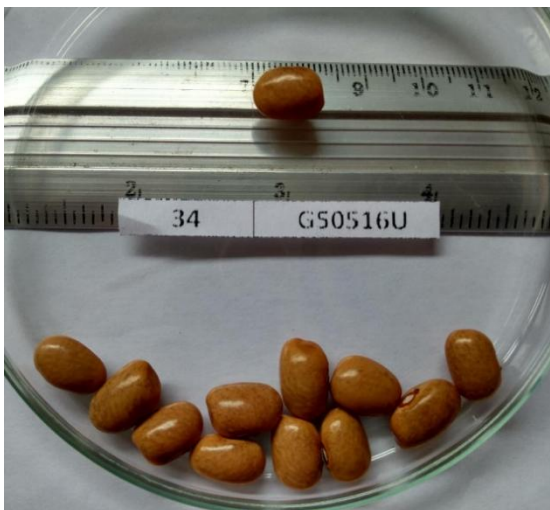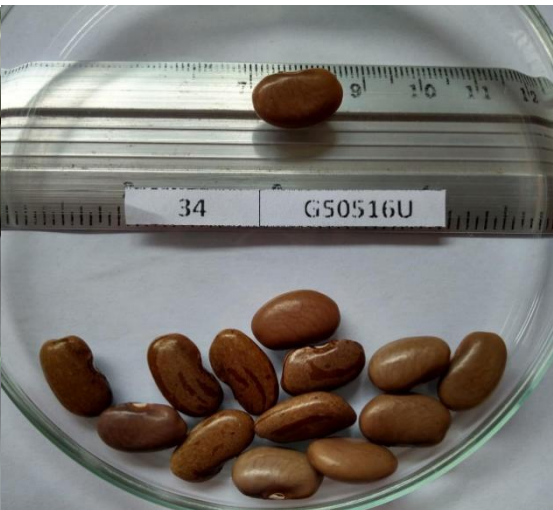

Chosen



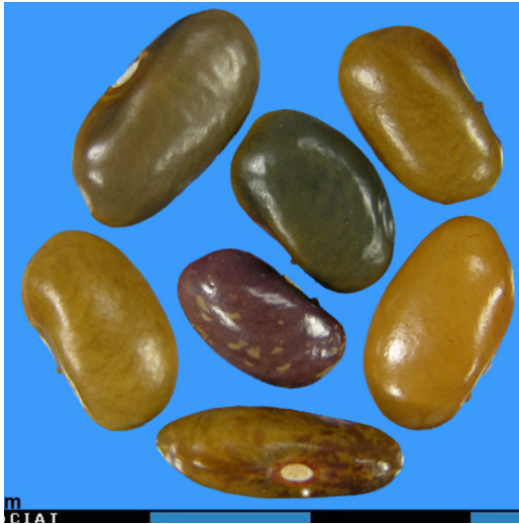

Sample 35 ID: G51285E (6)

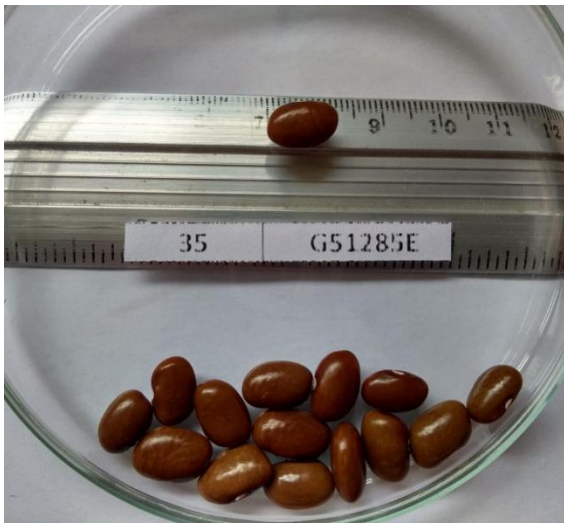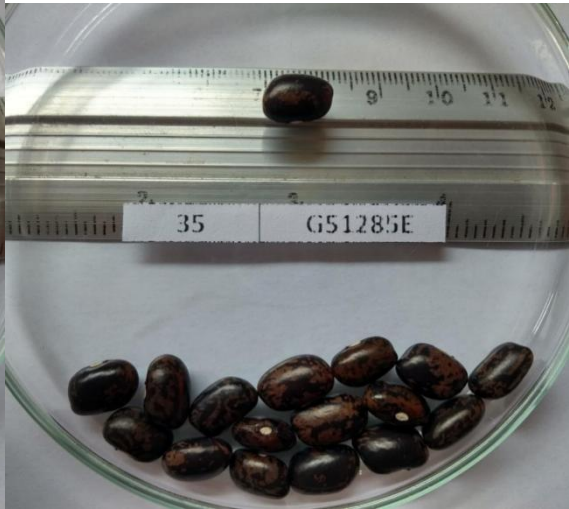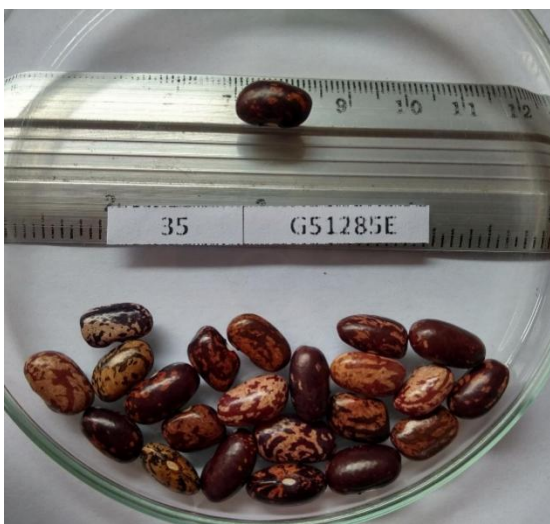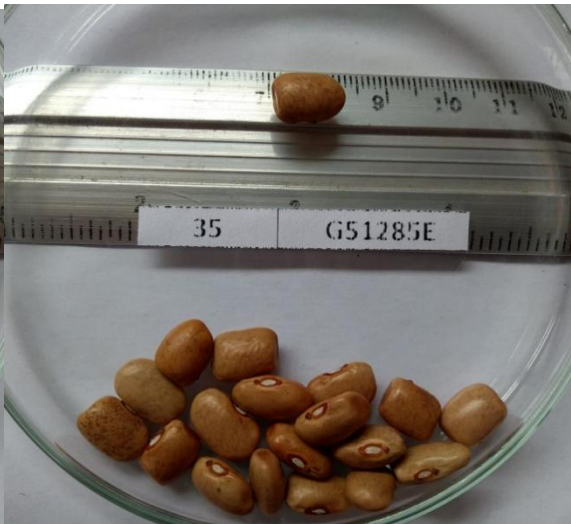

Chosen

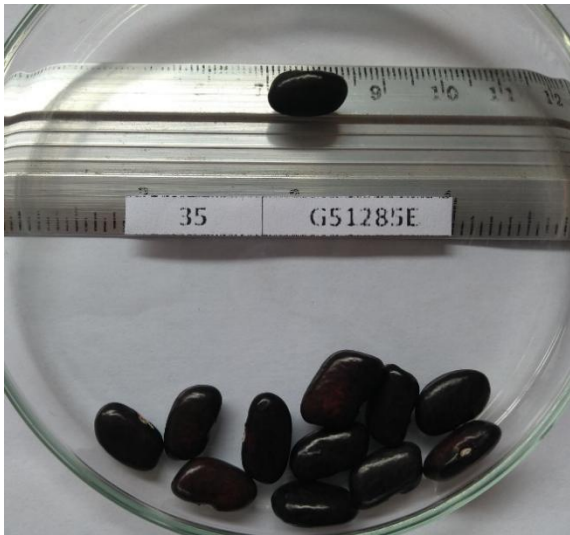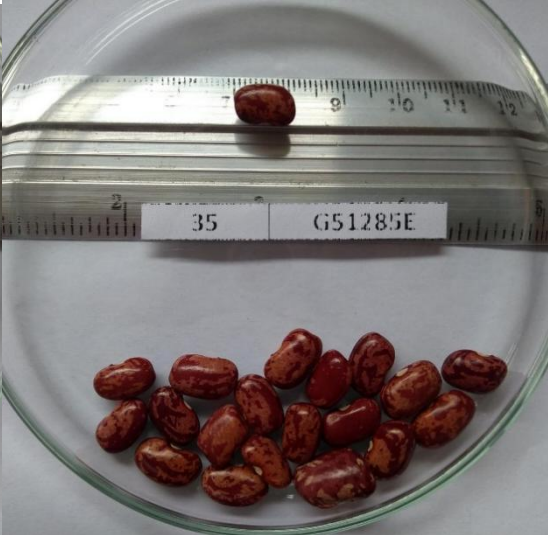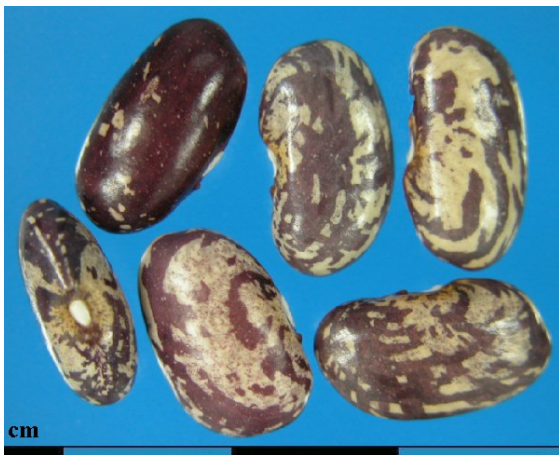

Sample 36 ID: G51285F (4)

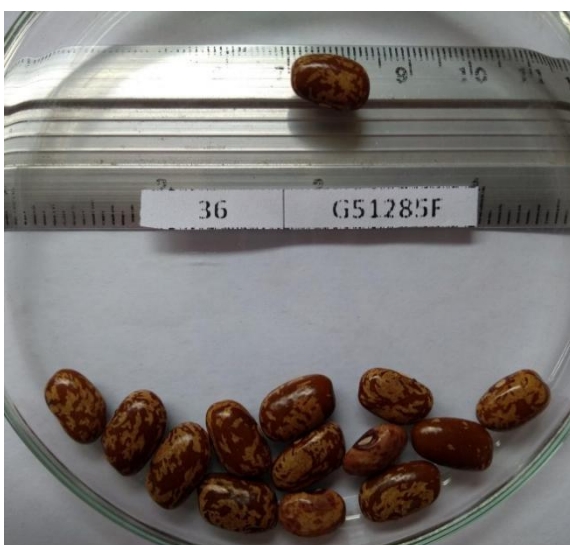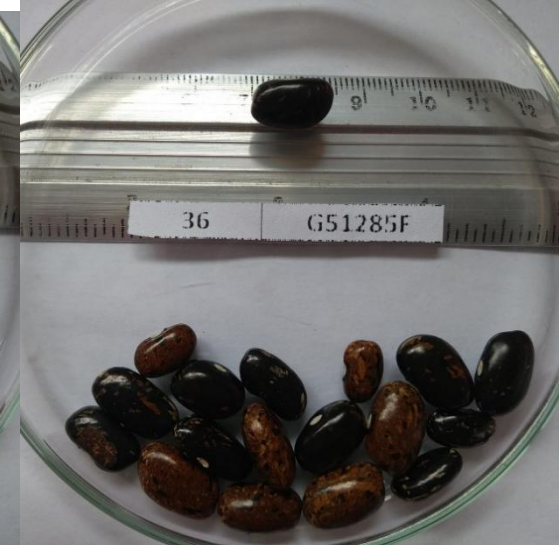



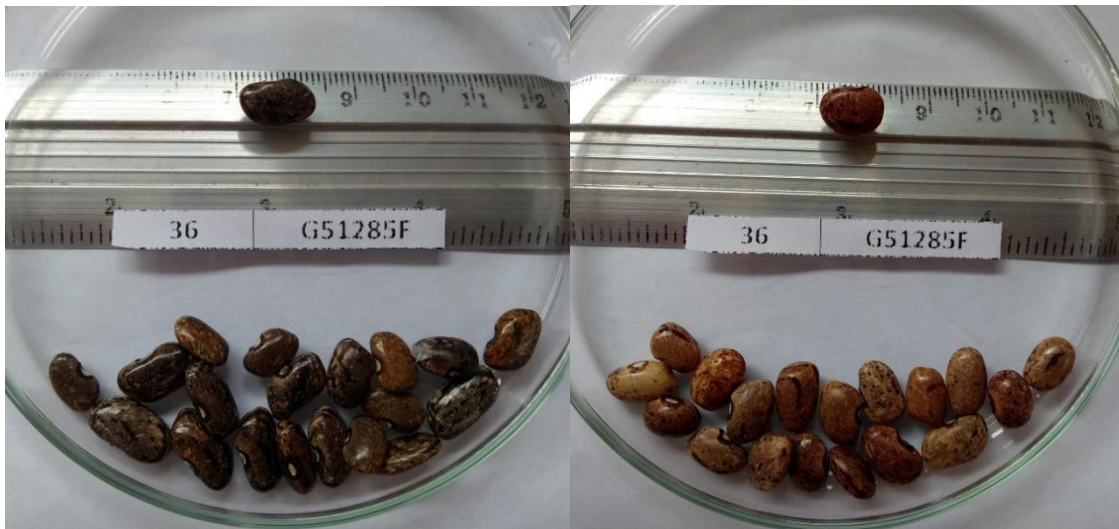

Chosen

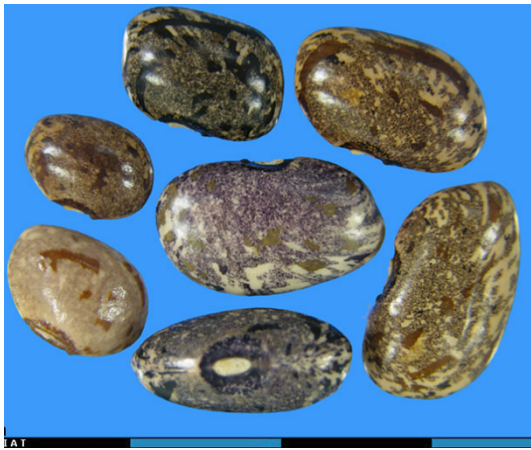

Sample 37 ID: G50516B (7)

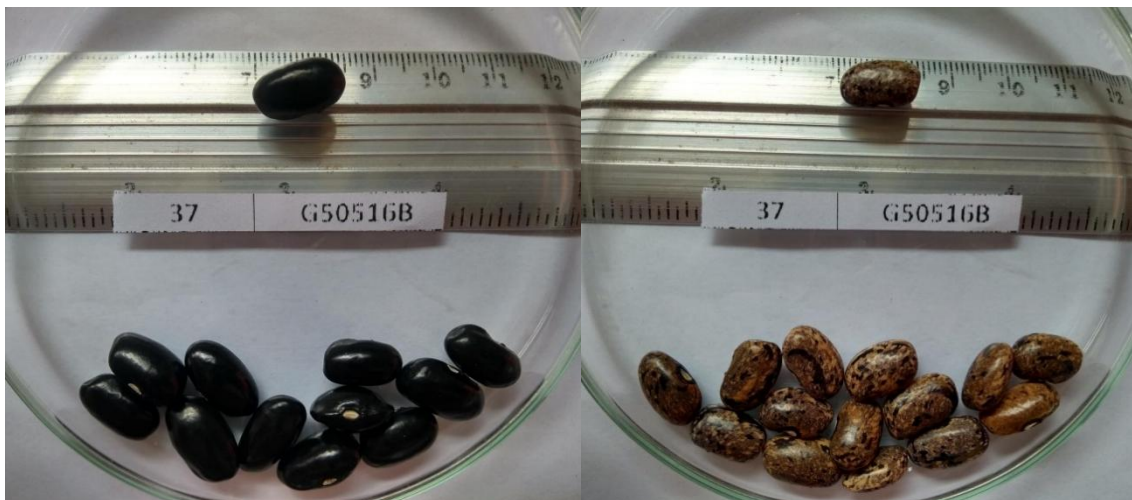

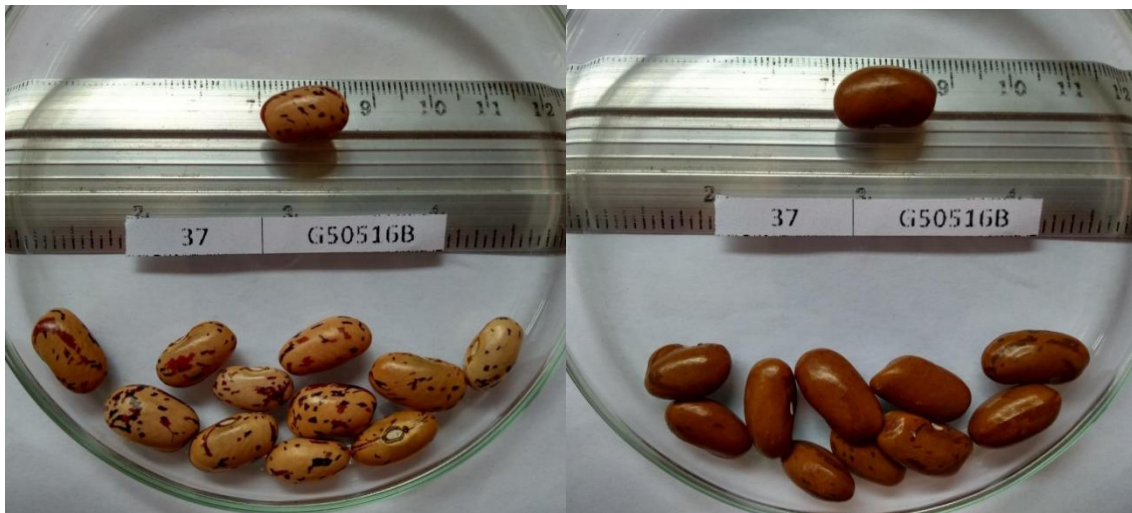

Chosen

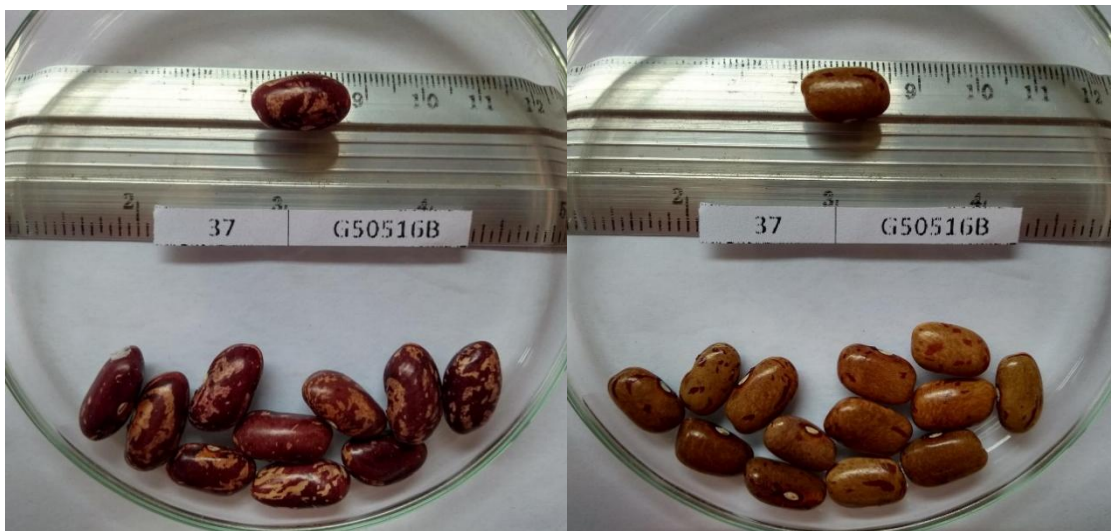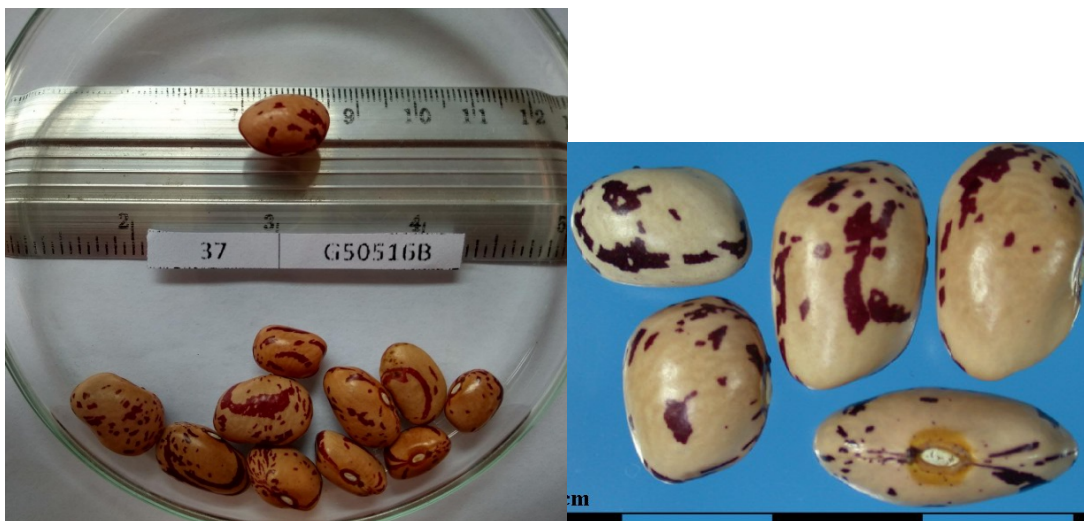

Chosen



Sample 38 ID: G50516C (9)

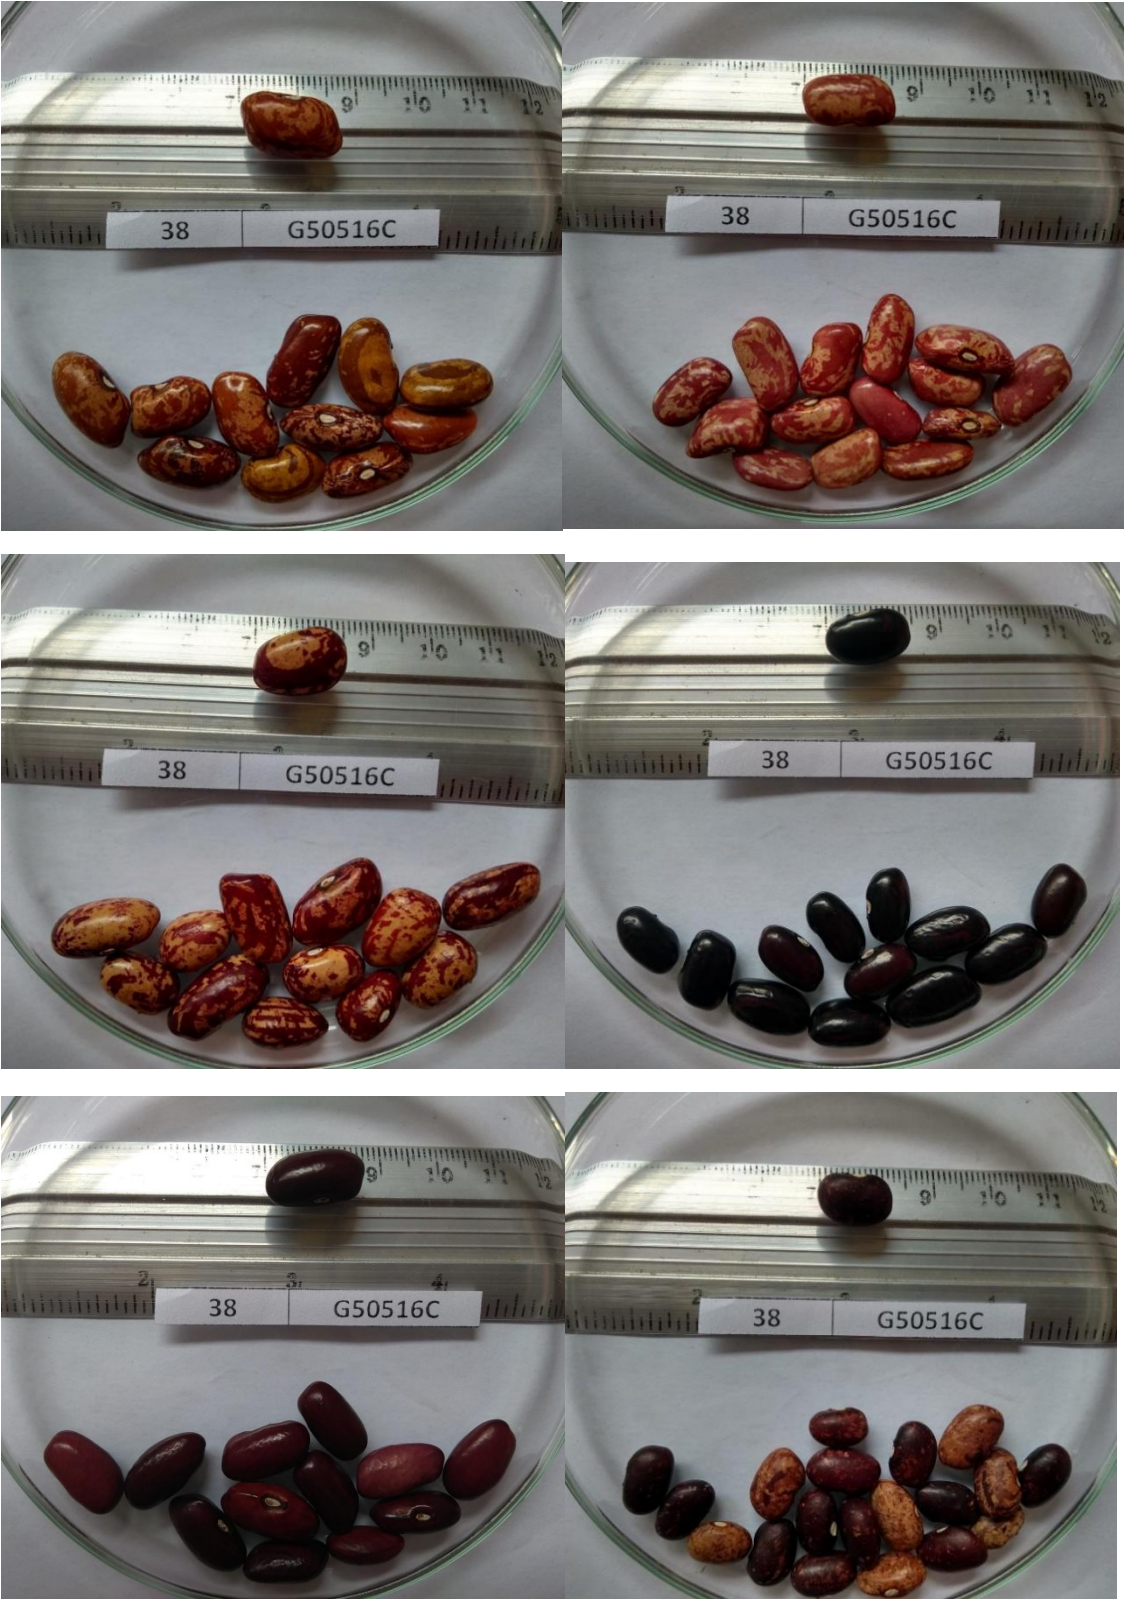

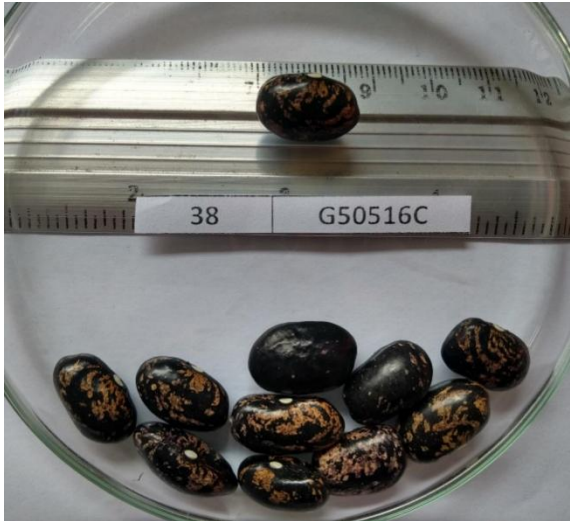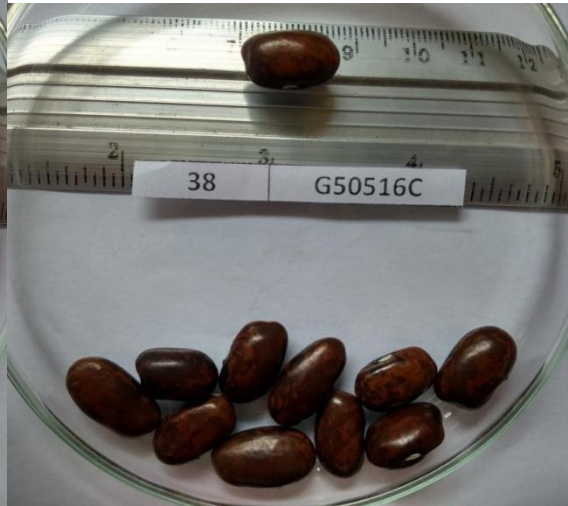

Chosen

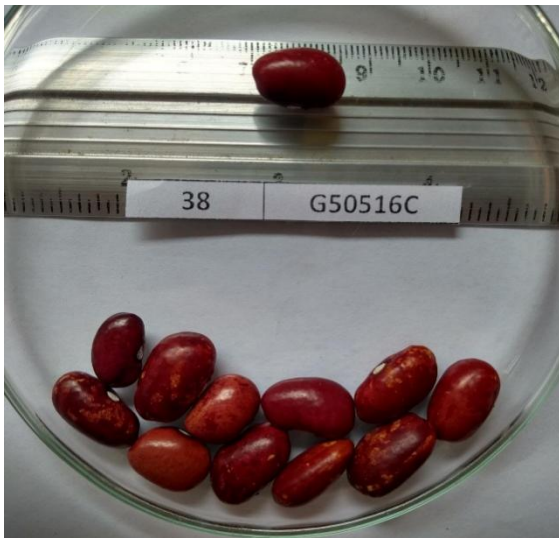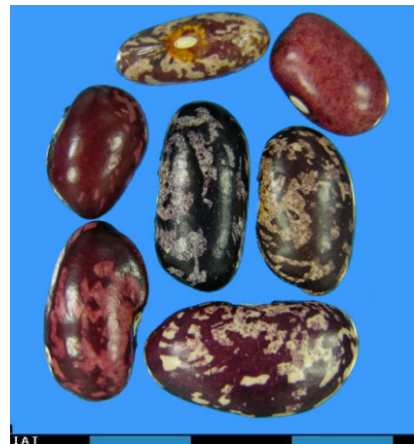

Chosen

Sample 39 ID: G50516D (13)

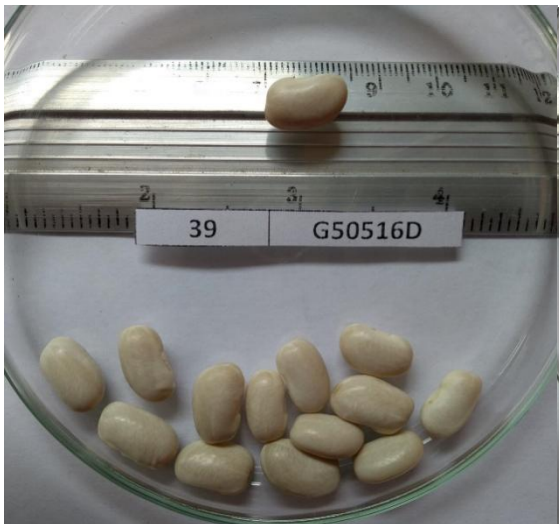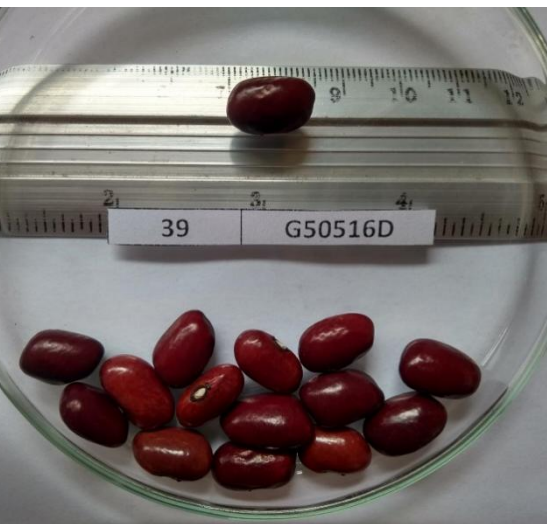



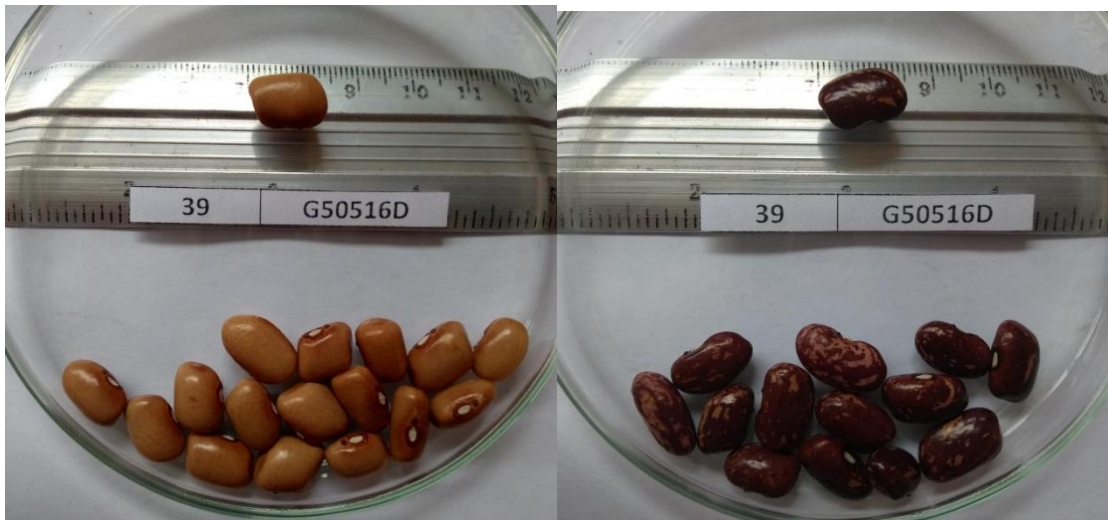

Chosen

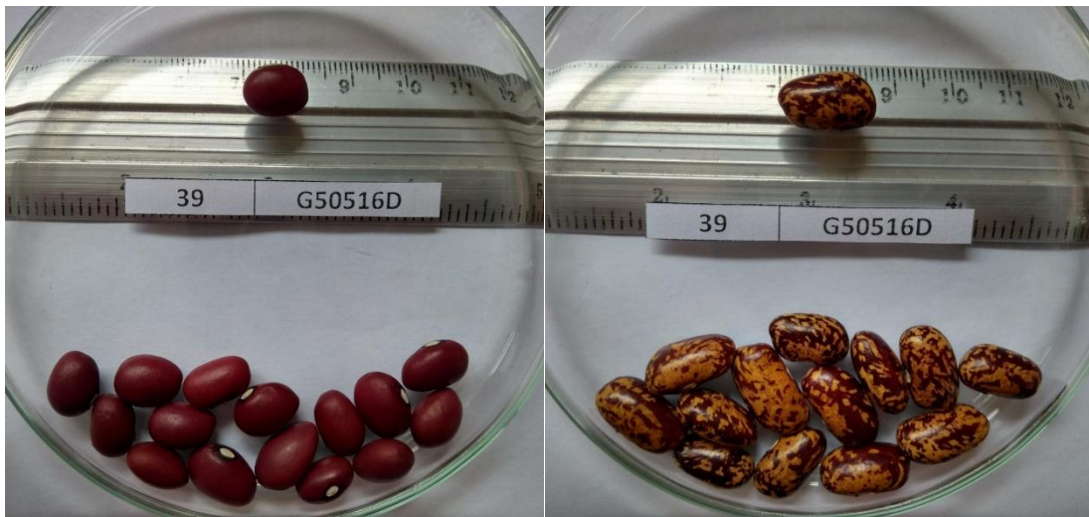

Chosen

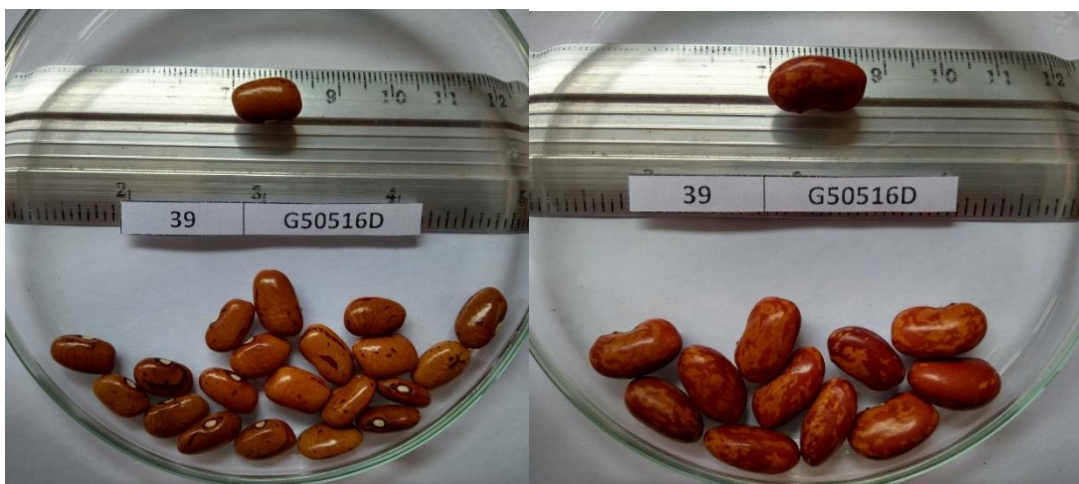

Chosen

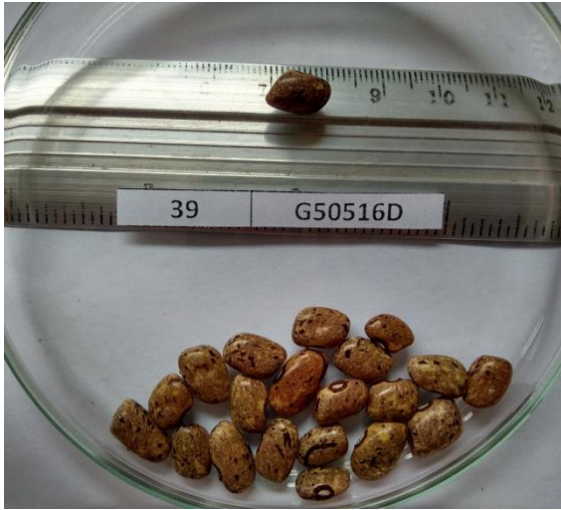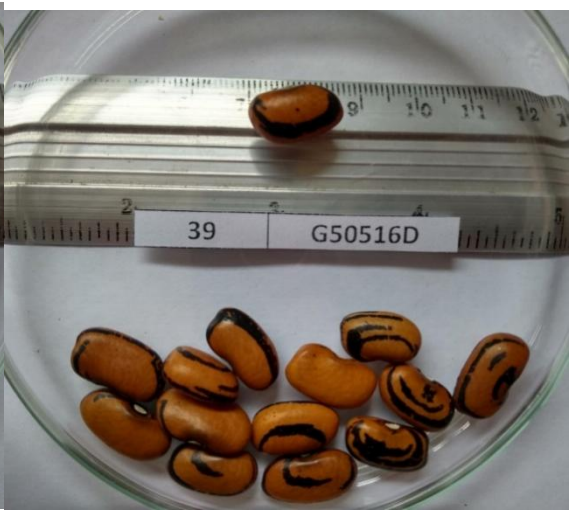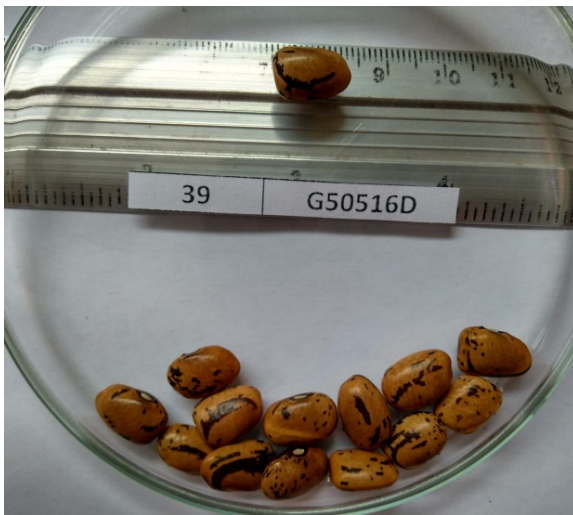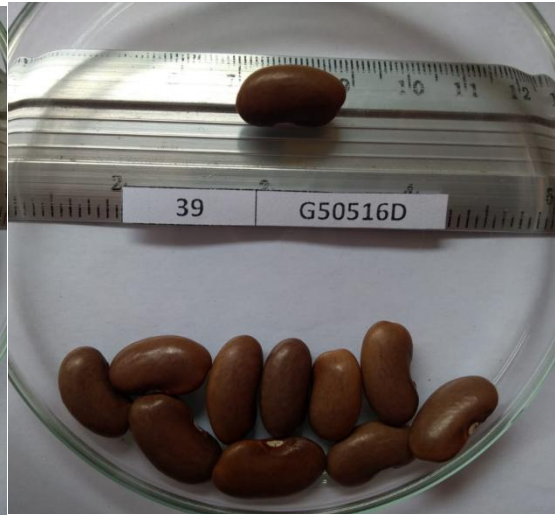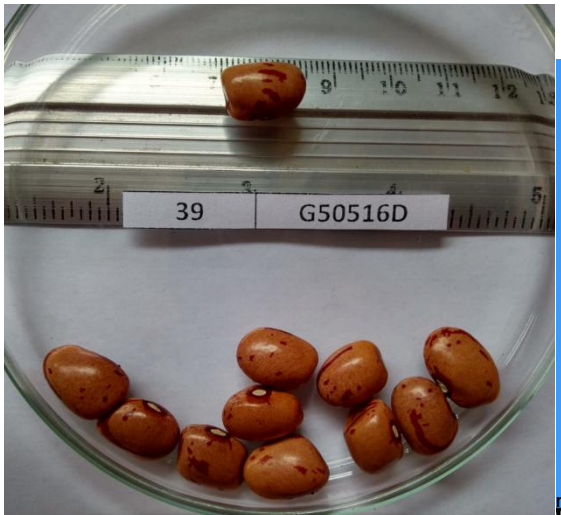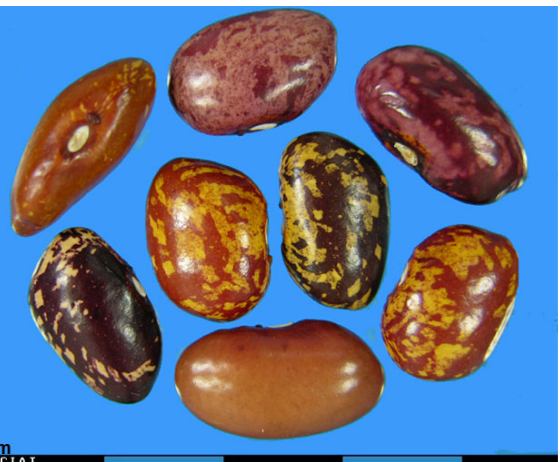



Sample 40 ID: G50516E (4)

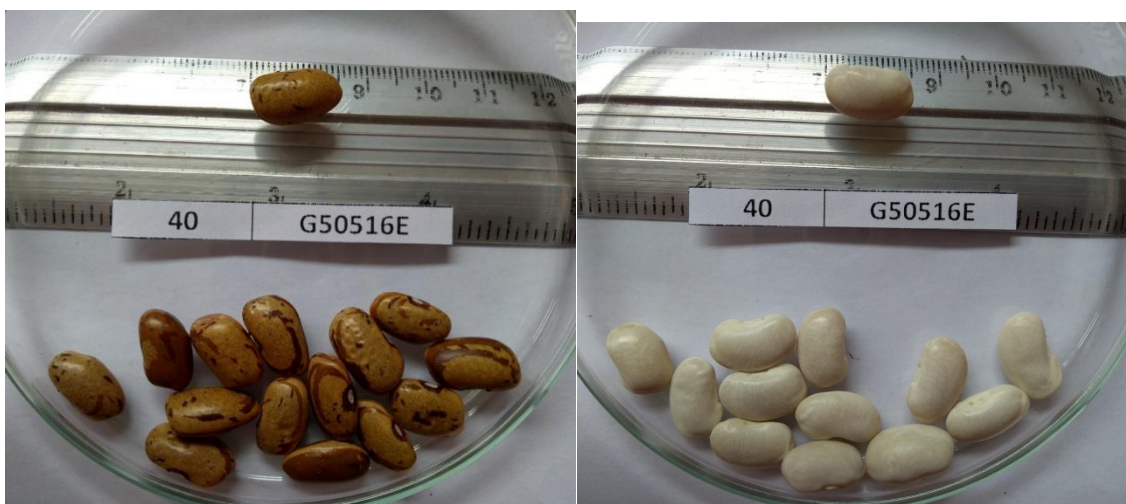

Chosen

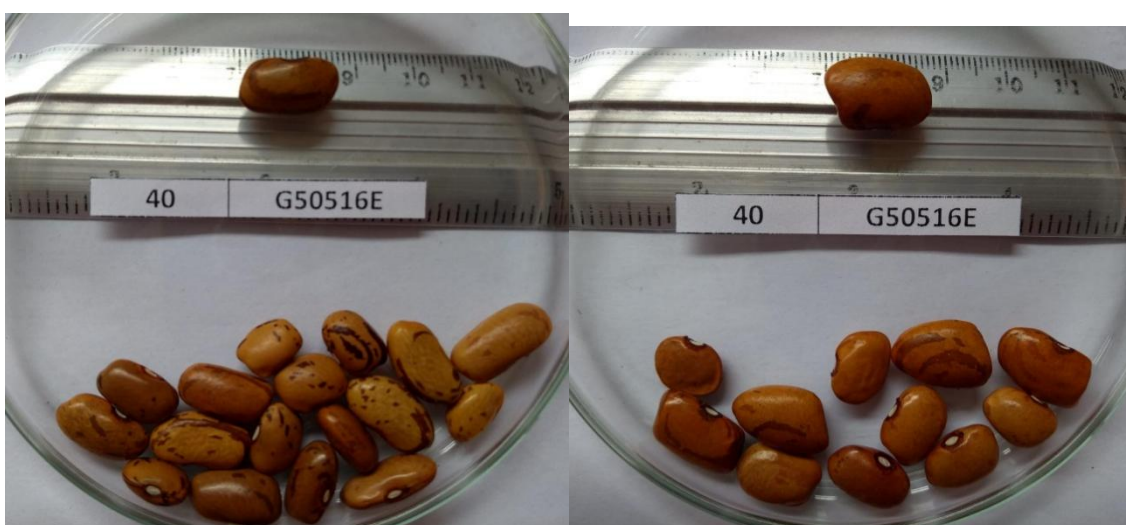

Chosen

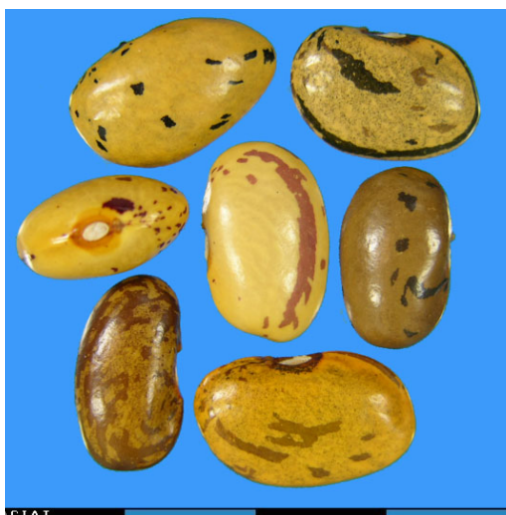

Sample 41 ID: G50516J (3)

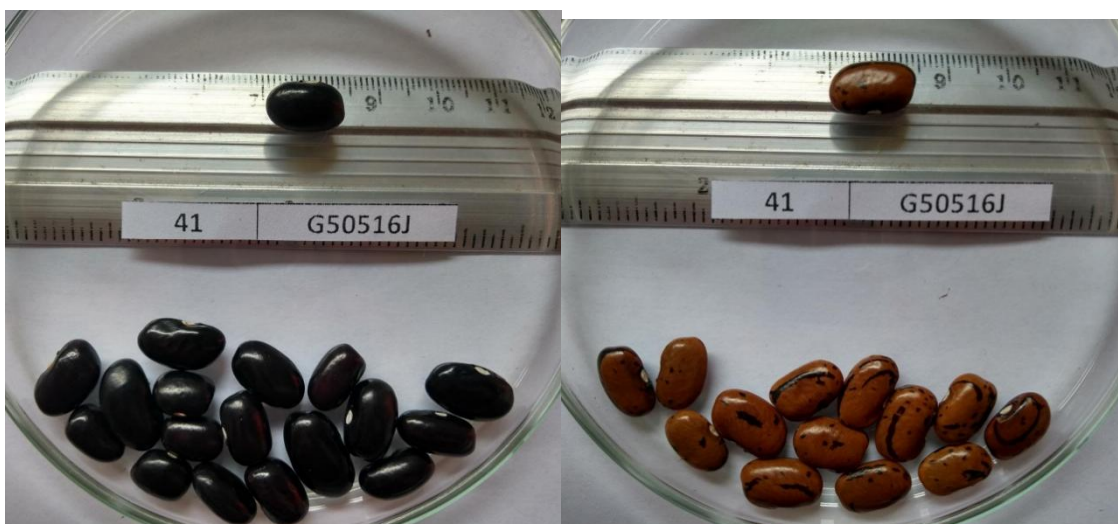

Chosen

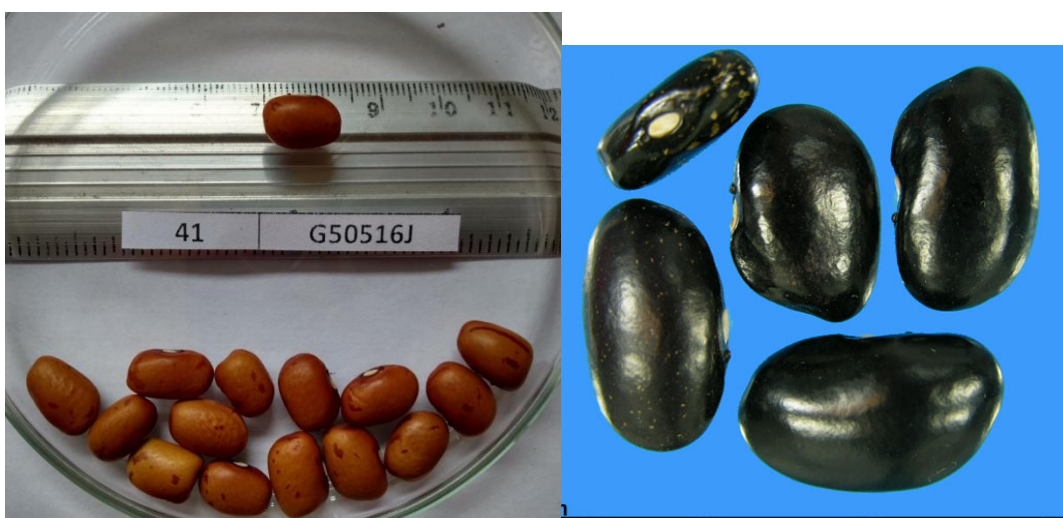

Sample 42 ID: G50516K (1)

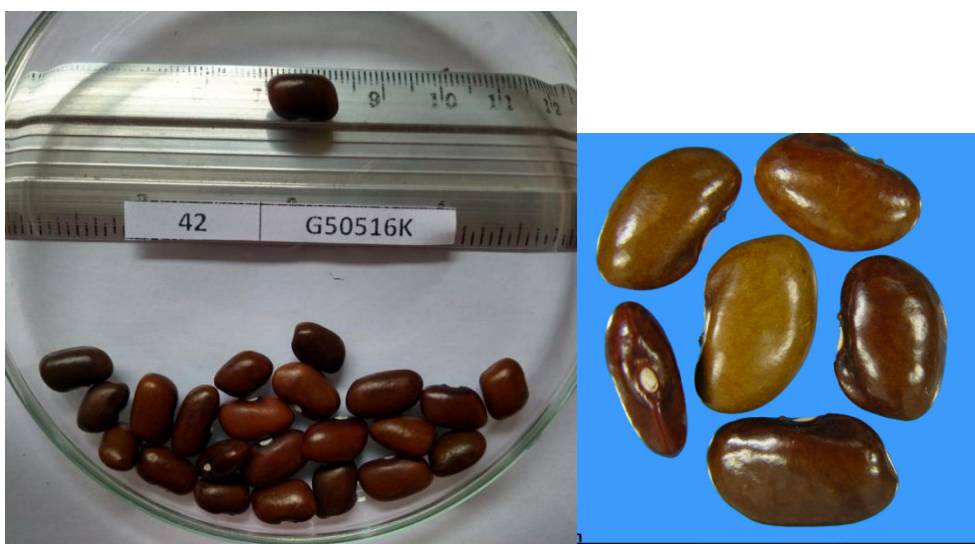



Sample 43 ID: G50516L (11)

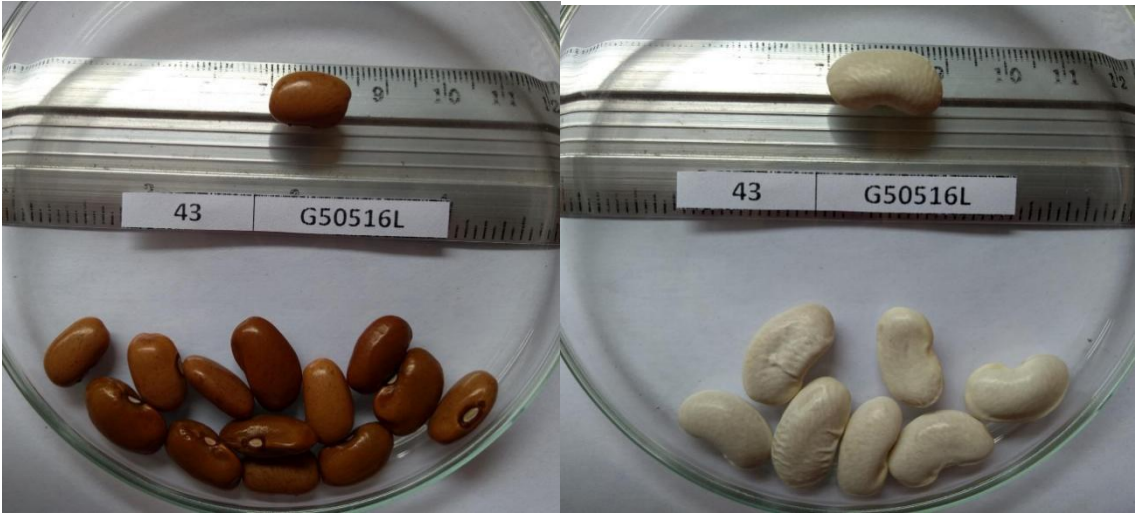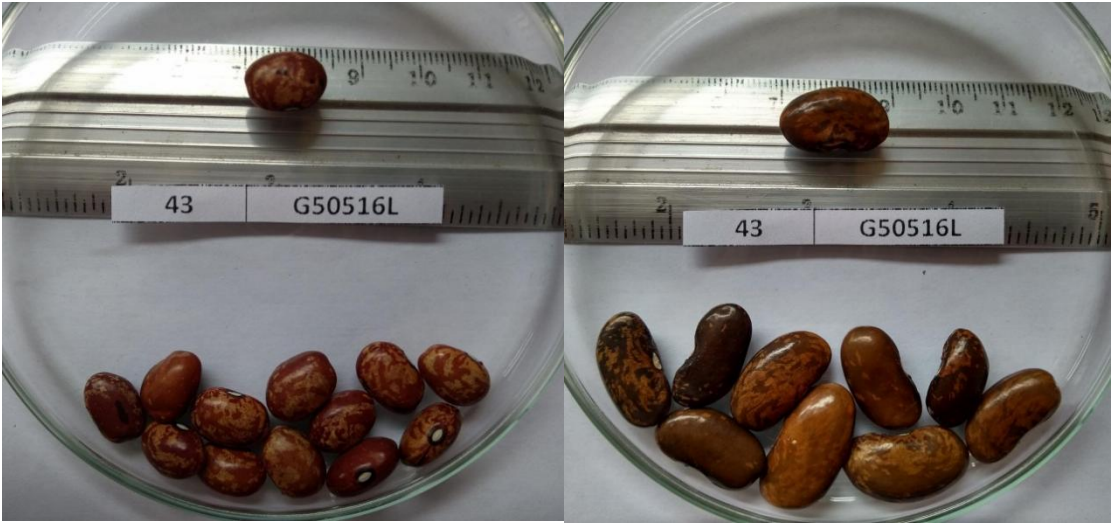

Chosen

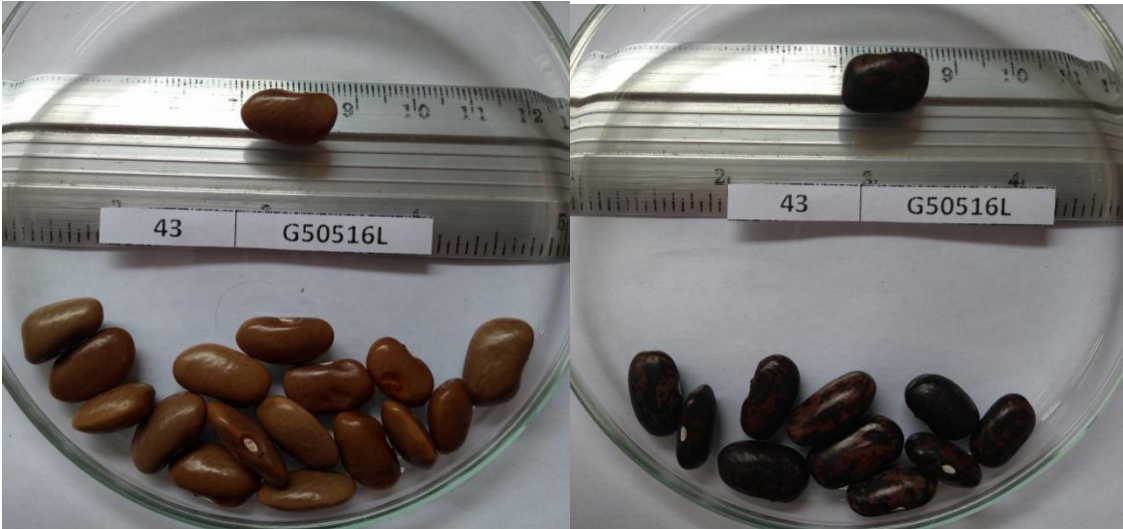

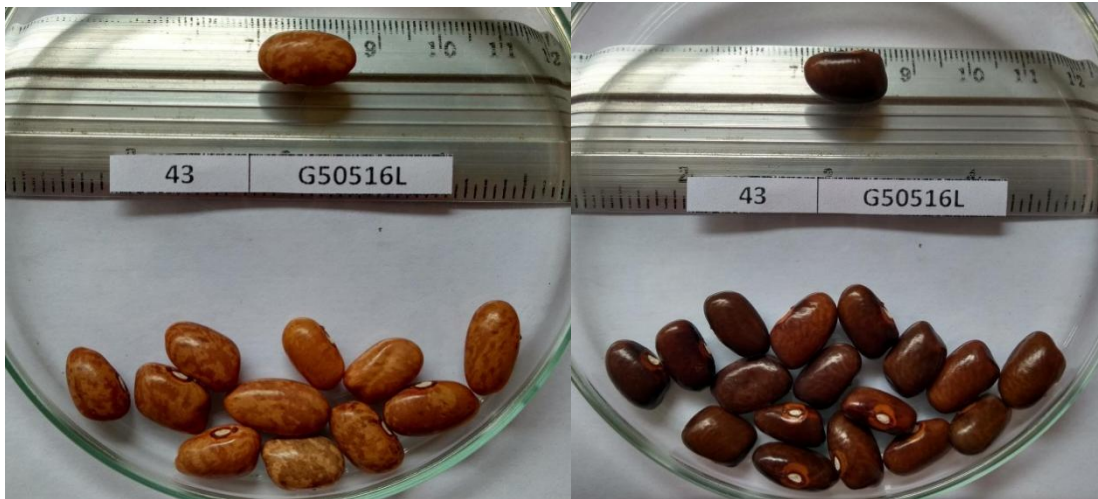

Chosen

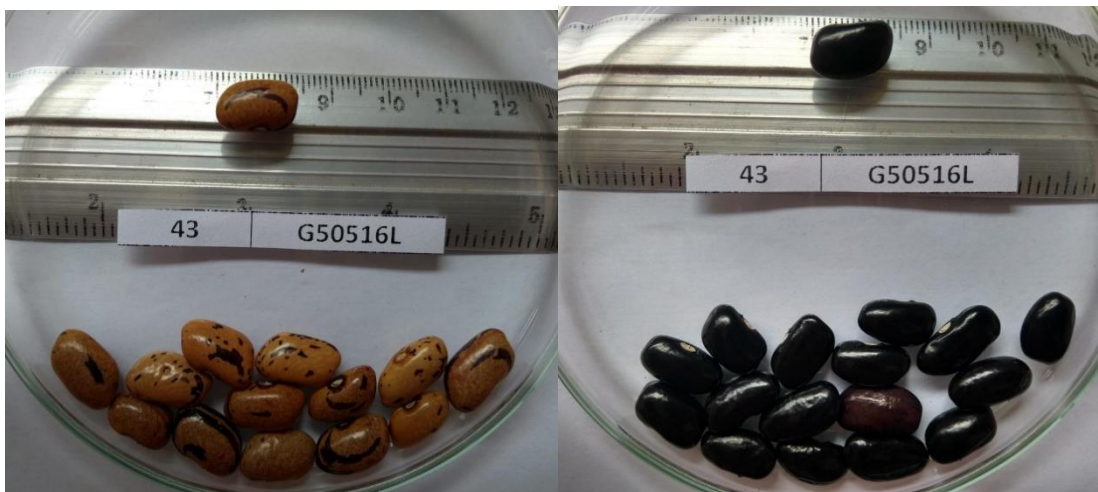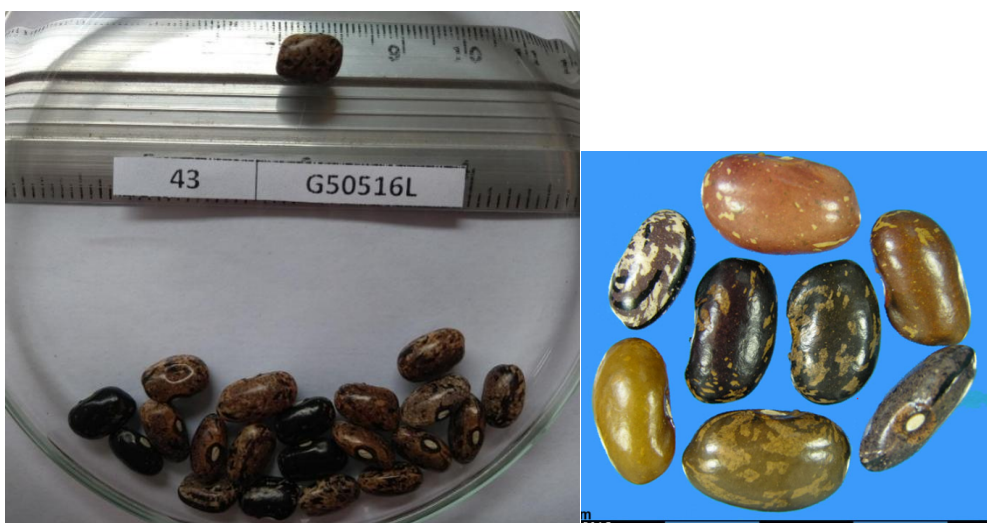

Chosen



Sample 44 ID: G50516N (5)

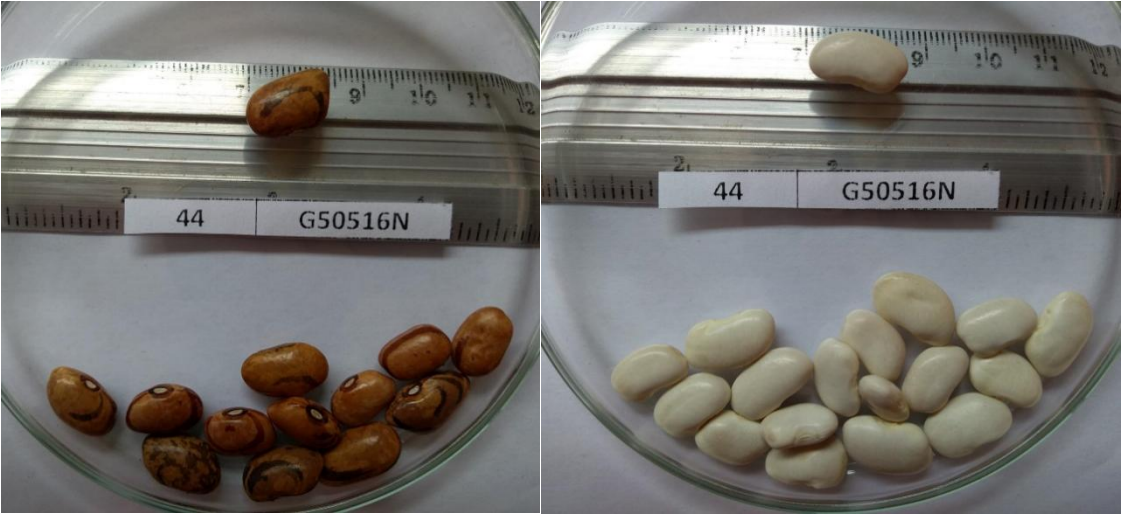

Chosen

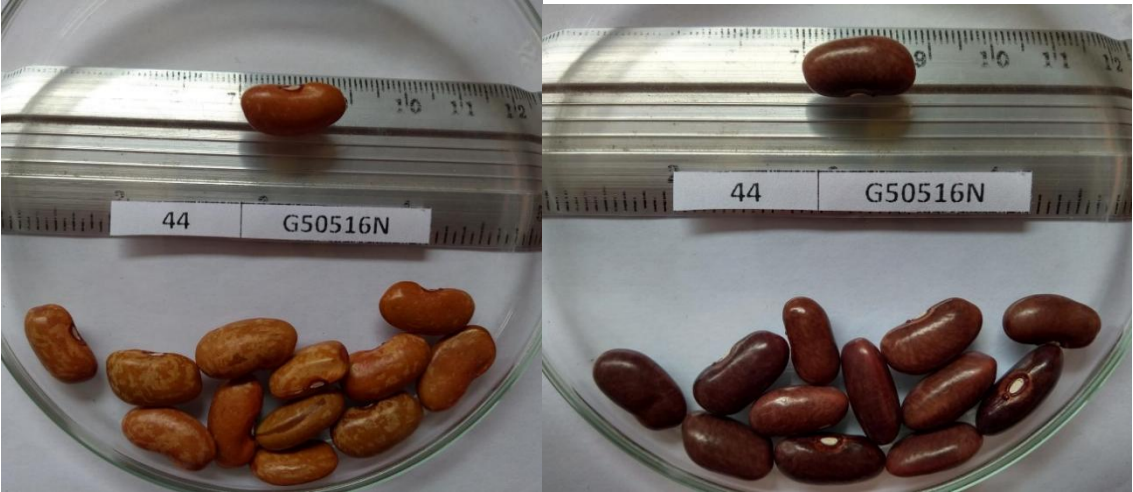

Chosen

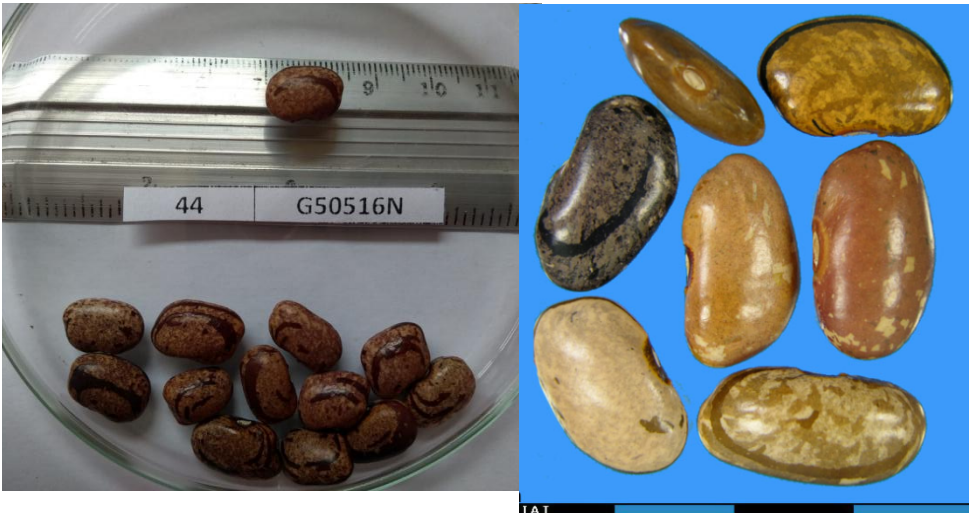

Chosen
