# Supplementary figures and images for: Genotype Selection, and Seed Uniformity and Multiplication to Ensure Common Bean (Phaseolus vulgaris L.) var. Liborino
Source: MDPI journal article supplement (doi:10.3390/agronomy12102285), 2022-09-23

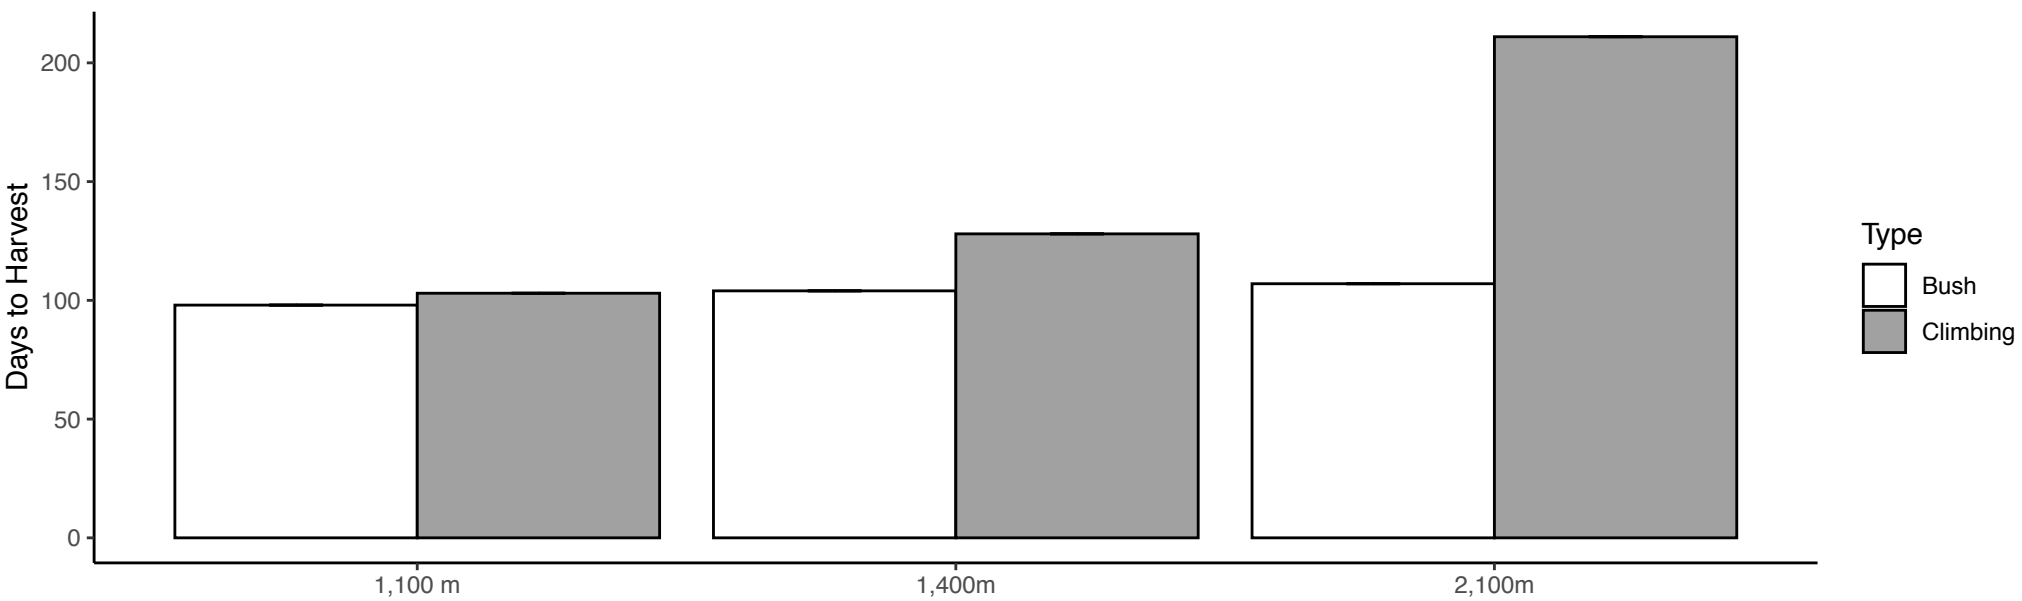

Supplement: s1 [file s1]
